# Supplementary material for: Moral distress among intensive care unit professions in the UK: a mixed-methods study
Source: PubMed Central journal article supplement — BMJ Open. 2023 Apr 25;13(4):e068918. doi: 10.1136/bmjopen-2022-068918 (PMC10151959; doi:10.1136/bmjopen-2022-068918), 2023-04-25
Supplement: bmjopen-2022-068918.draft_revisions.pdf [file bmjopen-2022-068918.draft_revisions.pdf]

# BMJ Open

BMJ Open is committed to open peer review. As part of this commitment we make the peer review history of every article we publish publicly available.

When an article is published we post the peer reviewers' comments and the authors' responses online. We also post the versions of the paper that were used during peer review. These are the versions that the peer review comments apply to.

The versions of the paper that follow are the versions that were submitted during the peer review process. They are not the versions of record or the final published versions. They should not be cited or distributed as the published version of this manuscript.

BMJ Open is an open access journal and the full, final, typeset and author-corrected version of record of the manuscript is available on our site with no access controls, subscription charges or pay-per-view fees (<http://bmjopen.bmj.com>).

If you have any questions on BMJ Open's open peer review process please email [info.bmjopen@bmj.com](mailto:info.bmjopen@bmj.com)

# BMJ Open

## Moral distress amongst intensive care unit professions in the UK: A mixed methods study

|                               |                                                                                                                                                                                                                                                                                                                                                                                                                                             |
|-------------------------------|---------------------------------------------------------------------------------------------------------------------------------------------------------------------------------------------------------------------------------------------------------------------------------------------------------------------------------------------------------------------------------------------------------------------------------------------|
| Journal:                      | <i>BMJ Open</i>                                                                                                                                                                                                                                                                                                                                                                                                                             |
| Manuscript ID                 | bmjopen-2022-068918                                                                                                                                                                                                                                                                                                                                                                                                                         |
| Article Type:                 | Original research                                                                                                                                                                                                                                                                                                                                                                                                                           |
| Date Submitted by the Author: | 11-Oct-2022                                                                                                                                                                                                                                                                                                                                                                                                                                 |
| Complete List of Authors:     | Boulton, Adam; University of Warwick, Warwick Medical School; University Hospitals Coventry and Warwickshire NHS Trust<br>Slowther, Anne-Marie; University of Warwick, Warwick Medical School<br>Yeung, Joyce ; University of Warwick, Warwick Medical School; University Hospitals Birmingham NHS Foundation Trust<br>Bassford, C; University of Warwick, Warwick Medical School; University Hospitals Coventry and Warwickshire NHS Trust |
| Keywords:                     | INTENSIVE & CRITICAL CARE, Adult intensive & critical care < ANAESTHETICS, Adult intensive & critical care < INTENSIVE & CRITICAL CARE, ETHICS (see Medical Ethics)                                                                                                                                                                                                                                                                         |
|                               |                                                                                                                                                                                                                                                                                                                                                                                                                                             |

SCHOLARONE™  
Manuscripts

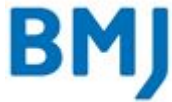

I, the Submitting Author has the right to grant and does grant on behalf of all authors of the Work (as defined in the below author licence), an exclusive licence and/or a non-exclusive licence for contributions from authors who are: i) UK Crown employees; ii) where BMJ has agreed a CC-BY licence shall apply, and/or iii) in accordance with the terms applicable for US Federal Government officers or employees acting as part of their official duties; on a worldwide, perpetual, irrevocable, royalty-free basis to BMJ Publishing Group Ltd ("BMJ") its licensees and where the relevant Journal is co-owned by BMJ to the co-owners of the Journal, to publish the Work in this journal and any other BMJ products and to exploit all rights, as set out in our [licence](#).

The Submitting Author accepts and understands that any supply made under these terms is made by BMJ to the Submitting Author unless you are acting as an employee on behalf of your employer or a postgraduate student of an affiliated institution which is paying any applicable article publishing charge ("APC") for Open Access articles. Where the Submitting Author wishes to make the Work available on an Open Access basis (and intends to pay the relevant APC), the terms of reuse of such Open Access shall be governed by a Creative Commons licence – details of these licences and which [Creative Commons](#) licence will apply to this Work are set out in our licence referred to above.

Other than as permitted in any relevant BMJ Author's Self Archiving Policies, I confirm this Work has not been accepted for publication elsewhere, is not being considered for publication elsewhere and does not duplicate material already published. I confirm all authors consent to publication of this Work and authorise the granting of this licence.

1  
2  
3 **Original research article**  
4  
5  
6  
7  
8  
9

10  
11 **Moral distress amongst intensive care unit professions in the UK: A**  
12 **mixed methods study**  
13  
14  
15

16  
17  
18  
19 Adam J Boulton<sup>1,2</sup>, Anne-Marie Slowther<sup>1</sup>, Joyce Yeung<sup>1,3</sup>, Christopher Bassford<sup>1,2</sup>  
20  
21

22  
23 <sup>1</sup>Warwick Medical School, University of Warwick, Coventry, UK  
24

25  
26 <sup>2</sup>University Hospitals Coventry and Warwickshire NHS Trust, Coventry, UK  
27

28  
29 <sup>3</sup>University Hospitals Birmingham NHS Foundation Trust, Birmingham, UK  
30  
31

32  
33 Correspondence to: Dr Adam J Boulton  
34

35  
36 Email: adam.boulton@nhs.net  
37  
38

39  
40 Submitting author: Dr Adam J Boulton, Critical Care Unit, University Hospitals Coventry and  
41 Warwickshire NHS Trust, Clifford Bridge Road, Coventry, CV2 2DX, UK  
42  
43

44  
45  
46 Keywords: Moral distress; intensive care; ethical climate; staff wellbeing; burnout  
47  
48

49  
50  
51 Short title:  
52

53  
54 Moral distress in UK ICUs  
55  
56  
57  
58  
59  
60

## Abstract

### Objective

To assess the experience of moral distress amongst intensive care unit (ICU) professionals in the UK.

### Design

Mixed methods: validated quantitative measure of moral distress followed by purposive sample of responders who underwent semi-structured interviews.

### Setting

Four ICUs of varying size and speciality facilities.

### Participants

Healthcare professionals working in ICU.

### Results

227 questionnaires were returned and 15 interviews performed. Moral distress occurred across all ICUs and professional demographics. It was most commonly related to providing care perceived as futile or against the patient's wishes/interests, followed by resource constraints compromising care. Moral distress score was independently influenced by profession ( $p=0.02$ ) (nurses 117.0 vs doctors 78.0). A lack of agency was central to moral distress and its negative experience could lead to withdrawal from engaging with patients/families. One-third indicated their intention to leave their current post due to moral distress and this was greater amongst nurses than doctors (37.0% vs 15.0%). Moral distress was independently associated with an intention to leave their current post ( $p<0.0001$ ) and a previous post ( $p=0.001$ ). Participants described a range of individualised coping strategies tailored to the situations faced. The most common and highly valued strategies were informal and relied on working within a supportive environment along with a close-knit team, although participants acknowledged there was a role for structured and formalised intervention.

### Conclusions

Moral distress is widespread amongst UK ICU professionals and can have an important negative impact on patient care, professional wellbeing, and staff retention, a particularly concerning finding as this study was performed prior to the COVID-19 pandemic. Moral distress due to resource-related issues is more severe than comparable studies in North America. Interventions to support professionals should recognise the individualistic nature of coping with moral distress. The value of

1  
2  
3 close-knit teams and supportive environments has implications for how intensive care services are  
4 organised.  
5  
6  
7  
8  
9

### 10 **Strengths and limitations of this study**

- 11 • Largest study of moral distress in the UK ICUs to date and the first multi-centre study including  
12 units of varying size and sub-specialty capability.
- 13 • Only UK study to date use a mixed methods technique with assessment across multiple ICU  
14 professions.
- 15 • This study has explored how ICU professionals cope with moral distress, highlighting the value  
16 of individualised informal approaches, close-knit teams and supportive environments. This  
17 may inform how ICU professionals are supported and has potential implications for how  
18 intensive care services are organised.
- 19 • The study is a risk of selection bias and may not capture those who have left the profession  
20 due to moral distress or those with low levels of moral distress that do not appreciate the  
21 study's value.
- 22 • This study represents a snapshot of moral distress which may be influenced by current clinical  
23 case-mix within the ICU or how the participant is feeling at that time. How moral distress  
24 changes over time remains unexplored.
- 25  
26  
27  
28  
29  
30  
31  
32  
33  
34  
35  
36  
37  
38  
39  
40  
41  
42  
43  
44  
45  
46  
47  
48  
49  
50  
51  
52  
53  
54  
55  
56  
57  
58  
59  
60

## Introduction

The COVID-19 pandemic has highlighted the psychological challenges faced by intensive care professionals around the world, including moral distress.(1-4) A survey conducted by the British Medical Association found that 78.4% of doctors experienced moral distress during the pandemic.(5) The importance of staff wellbeing and combatting staff burnout was recognised prior to the pandemic and is a priority for healthcare services worldwide, including the NHS.(6-8) A key contributor to burnout is moral distress.(9-13) Moral distress is a constellation of emotional and psychological features that occur when a professional identifies an ethically correct course of action, but is prevented from following this course.(14-16) It can also occur in situations where there is uncertainty or conflict regarding the ethically correct action.(17-19) It can be deeply damaging to the individual and is associated with a tendency to leave the profession, with a consequent negative impact on patient care.(9, 20)

The intensive care unit (ICU) is a place where patients with life-threatening conditions may be treated with a variety of invasive and burdensome interventions.(21) Highly significant, complex, and difficult decisions are made on a regular basis.(22). This environment is highly susceptible to moral distress and hence moral distress amongst ICU professions is of concern.(14, 18, 23, 24)

Moral distress was first identified in ICU nurses in North America and has been most frequently studied in this population.(14, 18, 23-25) Similar causes of moral distress have also been found amongst other ICU professionals, including physicians, respiratory therapists, and healthcare students.(20, 26-30) Despite concerns over ICU staff wellbeing, burnout and moral distress in the NHS, moral distress remains poorly studied in the UK.(19, 31, 32)

This study was performed prior to the COVID-19 pandemic and its primary aim was to assess the experience of moral distress amongst ICU professionals in the UK. Secondary aims were to a) identify the most common causes of moral distress; b) determine the relationship between demographic and professional characteristics and moral distress; c) examine the relationship between moral distress and intention to leave the profession, and d) identify potential interventions to mitigate moral distress.

## Methods

The NHS Health Research Authority provided approvals for the study (IRAS:238379) and the research and development (R&D) department at University Hospitals Coventry and Warwickshire NHS Trust acted as study sponsor. The study was approved locally by each site's R&D department.

Participants were recruited from four adult ICUs. Sites A & B are large tertiary care hospitals with major trauma and complex multi-specialty surgical facilities and sites C & D are smaller district general hospitals with fewer specialist services. Sites C and D are part of the same organisational Trust so some staff work across both sites. Bed capacities of sites range from 12 to 80 beds. All full- and part-time healthcare professionals (HCP) working in the ICU were eligible. All grades and clinical professions were included, but students of any profession were excluded.

A paper questionnaire using the validated Measure of Moral Distress for Healthcare Professionals (MMD-HP (Supplementary File 1)) was distributed between February 2019 and February 2020.(33) The MMD-HP is a 27-item questionnaire that utilises a 0-4 point Likert scale to assess the frequency with which situations arise and the intensity of the moral distress caused.(25, 33) These are summed to produce overall frequency and intensity scores. Individual item frequency and intensity scores are multiplied together to produce a composite item score and these summed to generate an overall moral distress score. A free text section allows participants to describe additional scenarios not included in the MMD-HP inventory. The MMD-HP also includes two related questions concerning intention to leave the profession now or in the past due to moral distress.(33) Participant demographics were collected including profession, grade, age, gender, and years of ICU working experience.

Descriptive statistics were used to summarise demographics and moral distress scores. Individual item scores were ranked for comparison. Moral distress scores were non-normally distributed, as found in previous studies,(20, 31) and hence are presented as medians with IQRs and non-parametric statistical tests were used (Wilcoxon signed rank, Kruskal-Wallis). A sample size requirement calculation was not performed as there was inadequate UK data using the MMD-HP. Multiple linear regression was used to investigate the relationship between age and ICU experience and moral distress scores. Multiple logistic regression models were fitted to determine the association between moral distress scores and tendency to leave the profession. Covariates were pre-specified demographic and professional variables, with binary classification used for profession (nurse vs other) and hospital type (tertiary care vs district general). Discrimination of logistic regression models was assessed using area under the receiver operator curve (ROC AUC). For tendency to leave a previous position, an ordinal logistic regression was used in accordance with the ordinal dependent variable. Statistical analyses were



1  
2  
3 performed using R version 3.6.1 (R Foundation for Statistical Computing) with the code for analyses  
4 available on request.  
5  
6

7 Questionnaire respondents willing to take part in an interview included their contact details on the  
8 returned questionnaire and from those responders, potential interview participants were purposively  
9 sampled for hospital, profession, grade, and overall moral distress score. Written informed consent  
10 was obtained prior to interview. Interviews were conducted face to face between July 2019 and  
11 February 2020 and explored participants experience of moral distress, the situations that cause it,  
12 strategies they use to cope with it; and their views on possible interventions to alleviate moral distress.  
13 Interviews were audio-recorded and transcribed verbatim. Transcripts were uploaded to NVivo  
14 software and analysed using thematic analysis(34). All transcripts were coded by AB with 30%  
15 independently coded by AMS. Codes and emerging themes were discussed at regular analysis  
16 meetings.  
17  
18  
19  
20  
21  
22  
23

### 24 **Patient and Public Involvement**

25 The study received contributions from the patient and public representatives from the University  
26 Hospitals Birmingham Clinical Research Ambassador Group. The members supported the proposed  
27 study and the saw potential for the work to benefit staff wellbeing and patient care. The group  
28 contributed to the study design, development of study documentation, including the protocol and  
29 participant information sheet, and the dissemination plan.  
30  
31  
32  
33  
34  
35  
36  
37  
38

### 39 **Results**

40 Two hundred and twenty-seven questionnaires were returned from a total of 772 questionnaires  
41 distributed across all sites, giving an overall response rate of 29.4% (site A 28.3%, site B 24.0%, sites C  
42 & D 34.6%). Participant demographics are described in Table 1. Forty-one of the 227 participants  
43 completing the paper questionnaire indicated a willingness to take part in an interview, twenty-one  
44 were contacted with an invitation and further information about the interview study and 15 agreed  
45 to be interviewed. Interview participant demographics are summarised in Supplementary Table 1.  
46  
47  
48  
49  
50  
51  
52  
53  
54  
55  
56  
57  
58  
59  
60

**Table 1** Participant demographics

| <b>Characteristic</b>                      | <b>N=227</b>    |
|--------------------------------------------|-----------------|
| Mean age $\pm$ SD – years                  | 38.1 $\pm$ 10.3 |
| Gender – no. (%)                           |                 |
| <i>Female</i>                              | 165 (72.7%)     |
| <i>Male</i>                                | 52 (23.0%)      |
| <i>Not answered</i>                        | 10 (4.4%)       |
| Profession – no. (%)                       |                 |
| <i>Nurse</i>                               | 145 (63.9%)     |
| <i>Doctor</i>                              | 40 (17.6%)      |
| <i>Physiotherapist</i>                     | 9 (4.0%)        |
| <i>Advanced Critical Care Practitioner</i> | 8 (3.5%)        |
| <i>Pharmacist</i>                          | 2 (0.9%)        |
| <i>Not answered</i>                        | 23 (10.1%)      |
| Mean ICU experience $\pm$ SD – years       | 10.1 $\pm$ 9.2  |

### Moral distress scenarios

Fourteen questionnaires were excluded due to missing responses preventing calculation of the moral distress score. Items are ranked by composite score for nurses and doctors in Supplementary Table 2. The most highly scored items by both nurses and doctors related to delivering aggressive treatment that was perceived as futile or not in the patient's best interests. Other highly ranked items related to lack of resources, caring for more patients than is considered safe, excessive documentation, lack of administrative support, and abusive patients/family members compromising care. Nurses generally rated moral distress frequency and intensity more highly than doctors. Only four of the 27 items had a greater composite score for doctors over nurses and there was no commonality in the root causes of these scenarios.

### Moral distress score associations

Total composite moral distress scores were positively skewed with a median score of 108 (IQR 78.2, range 0 to 288). The relationship between overall moral distress score and demographic characteristics are summarised in Figure 1. Moral distress was greater in females than males (111.5 (IQR 75.5) vs 94.0 (IQR 69.3),  $W=4755.5$ ,  $p=0.043$ ) and was significantly influenced by profession ( $H=11.89$ ,  $p=0.018$ ) with nurses reporting greater moral distress than doctors (117.0 (IQR 65.5) vs 78.0 (IQR 73.0)). There were differences in the distribution of gender across professions (Nurse: 83.7% female; Doctor: 40.0% female). Differences in moral distress between nurses and doctors persisted after statistical adjustment for differences in gender across professions ( $p=0.020$ ). There was no relationship between overall moral distress score and participant age and ICU experience. This was confirmed with multiple linear regression where an interaction effects model of age and ICU experience against overall moral distress could only explain less than 1% of the variation in moral distress (adjusted  $R^2$  0.0089). Median moral distress scores were higher in larger tertiary care hospitals than district general hospitals, however this did not reach statistical significance (114.5 (IQR 91.8) vs 98.0 (IQR 69.9),  $W=5012.5$   $p=0.23$ ).

### Intention to leave the profession

Seventy-one (33.3%) participants indicated their intention to leave their current post due to moral distress. Twenty-eight (13.1%) participants reported they had left a previous post due to moral distress and 101 (47.4%) reported they had considered leaving a previous post due to moral distress but did not leave. Overall moral distress was significantly greater in those intending to leave their current post (135.5 (IQR 84.5) vs 88.9 (IQR 65.3),  $W=2771.5$   $p<0.0001$ ) and this difference was confirmed in both univariate and multiple logistic regression analyses. Logistic regression model variable ORs are summarised in Table 2. Multiple logistic regression included profession, gender, hospital type, age and

1  
2  
3 ICU experience as covariates and had good discrimination (ROC AUC 0.722) and ability to predict  
4 intention to leave (Supplementary Figure 1). Adjusted odds ratio for moral distress score against  
5 intention to leave was 1.011 (95% CI 1.005-1.017,  $p<0.001$ ).  
6  
7

8  
9 A greater proportion of nurses were considering leaving their current post due to moral distress than  
10 doctors (37.0% vs 15.0%). Nurses had a significantly greater odds of reporting an intention to leave  
11 the profession in both unadjusted (OR 3.013, 95% CI 1.442-6.810,  $p<0.01$ ) and adjusted analyses  
12 (adjOR 3.023, 95% CI 1.243-8.014,  $p=0.019$ ). There was no significant association between gender and  
13 intention to leave the profession in either unadjusted or adjusted models.  
14  
15  
16

17  
18 Moral distress score was significantly associated with the ordinal outcome of leaving a previous post  
19 in unadjusted and adjusted analyses (OR 1.010, 95% CI 1.006-1.015,  $p<0.0001$ ; adjOR 1.009, 95% CI  
20 1.004-1.014,  $p=0.001$ ). Female gender and nurse profession were not significantly associated with  
21 leaving a previous post in adjusted analyses. Ordinal logistic regression model variable ORs are  
22 summarised in Supplementary Table 3.  
23  
24  
25  
26  
27  
28  
29  
30  
31  
32  
33  
34  
35  
36  
37  
38  
39  
40  
41  
42  
43  
44  
45  
46  
47  
48  
49  
50  
51  
52  
53  
54  
55  
56  
57  
58  
59  
60

**Table 2** Logistic regression model variables and association with intention to leave current post in univariable and multiple analyses. Italics and \* indicate statistically significant association. (OR=Odds Ratio, CI=Confidence Interval)

| Variable                        | Univariable OR<br>(95% CI) | p-value    | Multivariable OR<br>(95% CI) | p-value   |
|---------------------------------|----------------------------|------------|------------------------------|-----------|
| Age (per year)                  | 0.995 (0.966 – 1.024)      | 0.739      | 0.982 (0.929 – 1.036)        | 0.516     |
| ICU experience (per year)       | 1.005 (0.973 – 1.038)      | 0.762      | 1.009 (0.929 – 1.072)        | 0.781     |
| Gender                          |                            |            |                              |           |
| <i>Male</i>                     | Ref                        | Ref        | Ref                          | Ref       |
| <i>Female</i>                   | 1.289 (0.645 – 2.679)      | 0.482      | 0.668 (0.271 – 1.630)        | 0.375     |
| Profession                      |                            |            |                              |           |
| <i>Other</i>                    | Ref                        | Ref        | Ref                          | Ref       |
| <i>Nurse</i>                    | 3.013 (1.442 – 6.810)      | 0.00496*   | 3.023 (1.243 – 8.014)        | 0.0188*   |
| Hospital type                   |                            |            |                              |           |
| <i>District general</i>         | Ref                        | Ref        | Ref                          | Ref       |
| <i>Tertiary care</i>            | 1.17 (0.648 – 2.132)       | 0.605      | 0.953 (0.466 – 1.948)        | 0.895     |
| Moral distress total (per unit) | 1.011 (1.006 – 1.017)      | 0.0000327* | 1.011 (1.005 – 1.018)        | 0.000883* |

### Experience of moral distress

Causes of moral distress and professionals' responses to it were explored in more depth in the interviews. Three distinct themes emerged in relation to causes of moral distress: providing care perceived to not be in the patient's best interests; resource constraints compromising care; and seniors being unable to protect staff. Illustrative quotes are reported in Table 3. Experiencing moral distress led to a range of negative emotions and behaviours (Supplementary Table 4). Frustration and anger were the most frequently described emotions. Experiencing moral distress could also lead to avoidance of interaction with patients and their family. Some participants described this behaviour as "self-protection". Experiencing and coping with moral distress had led some participants to question their future in intensive care. Junior doctors considering careers in intensive care had changed course after experiencing and struggling to cope with moral distress themselves or observing the impact on more senior colleagues, contemplating whether this was something they wanted for themselves.

**Table 3** Illustrative quotes from participant descriptions of scenarios causing moral distress

| Causes                                                            | Quotation example                                                                                                                                                                                                                                                                                                                                                                                                                                                                                                                                                                                                                                                                                                                                                                                                                                                                                                                                                                                                                                                                         |
|-------------------------------------------------------------------|-------------------------------------------------------------------------------------------------------------------------------------------------------------------------------------------------------------------------------------------------------------------------------------------------------------------------------------------------------------------------------------------------------------------------------------------------------------------------------------------------------------------------------------------------------------------------------------------------------------------------------------------------------------------------------------------------------------------------------------------------------------------------------------------------------------------------------------------------------------------------------------------------------------------------------------------------------------------------------------------------------------------------------------------------------------------------------------------|
| Endless care                                                      | <p><i>“And that kind of torture of not knowing, it’s not like there is something difficult to be done and we know what it is, the fact that it just drags and drags and drags on like this with no kind of end in sight, you know, like motorway traffic and you don’t know, you know if it’s just off the next junction and then you think I can bear it but if this is going to be all the way to Manchester, it’s that sort of, it’s difficult.” (Doctor 5)</i></p> <p><i>“But the families have lost completely that narrative that this is a child that is going to die or an adult that is going to die soon. Exactly the same way with cancer patients, you know, ultimately someone has got to tell them that their cancer is incurable. That message is lost from these adults and so then the problem is you are starting from a point where these families and individuals have had massive amounts of aggressive interventional care,.... And they have lost the narrative that this is a child ultimately with a life limiting illness.” (Doctor 4)</i></p>                  |
| Disregard for patient wishes                                      | <p><i>“...he (the registrar) went to a patient on the ward and had a long chat with the patient ...and she basically said, I am done, I want to go home. And I was like okay right, this is a very senior doctor so that’s what she said, that’s her wishes, and then the next thing I know like she’s coming to ITU, getting lined and up and then she died in ITU like five days later or something.” (Doctor 3)</i></p> <p><i>“It was very distressing actually, really distressing because his motives (the consultant) were not about care and comfort for the patient.” (Nurse 6)</i></p>                                                                                                                                                                                                                                                                                                                                                                                                                                                                                           |
| External pressures to encourage delivery of perceived futile care | <p><i>“I just thought the bit that I didn’t understand was like multiple consultants were saying they didn’t think she was going to get well and that seemed to be like the collective ITU opinion but we still admitted her because it was what oncology wanted.” (Doctor 3)</i></p> <p><i>“...her family throughout have been, what’s the word? I want to say unreasonable but, they have been, they have resisted all honest conversation to the point now that the conversations that we have with them are not honest because they insist that they are not. Just really falsely optimistic despite all the preamble conversations ... I feel like somebody should be able to stop it but I don’t know who that might be... So then the kind of whole relationship has deteriorated to nothing between the family and the medical team.” (Doctor 5)</i></p>                                                                                                                                                                                                                          |
| Resource constraints compromising care                            | <p><i>“And we only had the capacity to see one of them. And the one that we saw was the sick person but then didn’t survive until the following day and the one we didn’t see ended up being ventilated for quite some time really, and it felt like we didn’t direct our resources to the right place there.” (Nurse 5)</i></p> <p><i>“So for example we had a lady who had a devastating intracranial haemorrhage, she was coming into the unit for neuro prognostication probably the organ donation process. We were stuck with her for hours and it was all the kind of chaos as it is in resus, [with] a grieving family... stuck by this bedside in resus which was like a zoo, there was building work going on, the whole thing was so undignified... They couldn’t get the bed [in ICU] because they couldn’t get the patients out, you know, everybody is stuck, stuck, stuck and at the end of it I was stuck with this patient in this awful environment with her grieving family, just thinking I can’t, this is just unbearable. It was just horrible.” (Doctor 5)</i></p> |
| Seniors unable to protect staff                                   | <p><i>“I would say the things that preoccupy me are not necessarily clinical things, they are more about my team and if I am concerned about the wellbeing of my team I will often worry about, you know, I don’t know what to do about this situation, I don’t know how to improve things ...There isn’t anything I can physically do, I can’t magic people to come and help, and the staff appreciate that but it’s still kind of, you worry for the people that are there continuing to work and their wellbeing and their stress levels.” (Nurse 5)</i></p>                                                                                                                                                                                                                                                                                                                                                                                                                                                                                                                           |

### Coping with moral distress

Participants described a range of strategies for coping with moral distress, tailoring their strategy to the particular situation. Strategies could be classified as internally or externally focussed. Illustrative quotes are reported in Supplementary Table 5. Internally focussed strategies included personal reflection, mental compartmentalisation, and self-care techniques. Personal reflection was commonly reported as a way of making sense of the distress experienced, however mandatory reflections were less helpful than when it occurred in an organic way. Externally focussed strategies include informal discussions with colleagues, talking to their friends/family, and more formal debrief sessions. The most frequently described and highly valued coping strategy involved talking with colleagues informally, such as chatting in the coffee room. The culture of the team appeared critical to allow informal talking to be effective. Participants valued a supportive environment with a close-knit, honest, and actively caring team. Smaller teams where staff knew each other well were reported as more supportive compared with larger teams where there was more movement of staff. Acknowledgment from a senior team member that a case was particularly distressing was powerful and reassuring. Conversely, seniors not wanting to engage in conversations was reported as detrimental to coping with moral distress.

Participants were asked about models of support that could help staff experiencing moral distress. Illustrative quotes are reported in Table 4. Generally, participants felt that a personalised approach tailored to the particular situation was needed. Formal approaches were seen as more valuable for junior staff who perhaps did not have the same developed coping strategies. In general however, participants felt that informal support would be more authentic, accessible, faster acting, and efficacious. Facilitated discussion was suggested as a way of enhancing the effectiveness of informal talking with colleagues. Multiple participants proposed identifying a nominated group of senior and/or experienced ICU staff who could provide support and advice on an *ad hoc* basis with allocated time to deliver this role. Participants highlighted the importance of organisations valuing the wider working environment in supporting staff to cope with distress. Ensuring avoidable stresses were removed or reduced would enable staff to have more emotional and cognitive capacity to deal with the moral challenges that they faced in their work. For example, adequate car parking, and responsive services such as IT, payroll and HR, were all cited as areas that would improve overall staff wellbeing.



**Table 4** Illustrative quotes from participant suggestions for interventions to support coping with moral distress

| Interventions                          | Quotation example                                                                                                                                                                                                                                                                                                                                                                                                                                                                                                                                                                                                                                                                                                                                                  |
|----------------------------------------|--------------------------------------------------------------------------------------------------------------------------------------------------------------------------------------------------------------------------------------------------------------------------------------------------------------------------------------------------------------------------------------------------------------------------------------------------------------------------------------------------------------------------------------------------------------------------------------------------------------------------------------------------------------------------------------------------------------------------------------------------------------------|
| Formal and structured support          | <p><i>"But getting somebody in to discuss things or an away day or a coffee morning and things, sometimes you don't get the right people going to that do you?... What about the group of staff that don't go on the away day, that drops morale because they didn't go on it. And also they're working with locums and agency, so they're actually having a bad day then. So you can get animosity even just doing something like that." (ACCP 1)</i></p> <p><i>"Well ideally a psychotherapist or somebody who has that professional backing or professional background to be able to support that because otherwise talking can only go so far." (Nurse 3)</i></p>                                                                                              |
| Group-based approach                   | <p><i>"You're potentially opening yourself up to a whole room of strangers is a bit like alcoholics anonymous, some people wouldn't be up for that." (Other 1)</i></p> <p><i>"...or, you know. I think you don't want to criticise where you work and knowing that it can come back to you and there is that feeling the more junior you are the easier it is for you to go isn't it, I think there is still that." (Nurse 6)</i></p>                                                                                                                                                                                                                                                                                                                              |
| Non-healthcare background              | <p><i>"Yes, so she came in, to kind of give us techniques but she just didn't really relate to healthcare it was more outside. So it just didn't relate to any of us... They can't relate it to us or how it would actually be working in a hospital." (Nurse 1)</i></p> <p><i>"I think it would be good to talk to people who know the environment because you don't have to explain all of that do you, you can just go in at a level of like mutual understanding and then you can just talk about the problem." (Doctor 5)</i></p>                                                                                                                                                                                                                             |
| Informal approach                      | <p><i>"What I would say is that where, I don't know, I have always found that the organic process has always been the most helpful. I don't know whether that's because in a sense you kind of have more control over who you go and chat to or whether it just has more authenticity." (Doctor 4)</i></p>                                                                                                                                                                                                                                                                                                                                                                                                                                                         |
| Nominated ICU staff for support        | <p><i>"I do wonder whether a facilitated system would be useful because I think the danger can be that if you've got people who are distressed talking to each other about the distress they can actually spiral down further... Rather than lift themselves out so a moderated sort of peer review or peer forum I guess would be helpful." (Doctor 1)</i></p> <p><i>"... have an identified person, say go to Adam, if you have got a problem go to Adam or its Adam's month to deal with all the grief or whatever. To say there is a role and you get a small bit of time for the role, the role exists in this place, it's paid for, it's budgeted and that's when it happens and get the right people to do it." (ACCP 2)</i></p>                            |
| Creating a wider nurturing environment | <p><i>"The other thing I think that's really important to think about is actually that going to work is not just about delivering the clinical care. So you know, I have to work in an organisation where commuting to hospital is difficult, where getting parking is difficult, where I don't have any office space, where IT systems are really slow, where the room er, there is a room to sleep in afterhours but it's noisy, it's not particularly dark, the temperature is not well controlled. And I know that all sounds like whinging, but actually one of the real challenges is that we work in organisations which are physically and organisationally not well set up to kind of look after the staff that are working for them." (Doctor 4)</i></p> |

## Discussion

This is the largest study of moral distress in UK ICUs to date and the first to use a multi-centre approach with assessment across ICU professions. Included ICUs were at both district general and teaching hospitals and were of varying size and sub-specialty capability. Moral distress was widespread across included sites and across ICU professions. Moral distress scores were highest in situations related to delivering aggressive treatment that was perceived as futile or not in the patient's best interests, closely followed by lack of resources compromising delivered care. Interview data also identified inability of senior staff to protect their juniors as a cause of moral distress. Moral distress was significantly worse in nurses and was not influenced by age or years of ICU experience. The multiple negative emotions engendered by this repeated experience can lead to withdrawal from engagement with patients and families, likely leading to poorer clinical care, and ultimately to withdrawal from intensive care as a career choice. There was a strong association between higher moral distress scores and intention to leave a current post, or leaving a previous post highlighting the impact moral distress may have on ICU staff retention. It is concerning that one third of participants reported an intention to leave their current post due to moral distress. Interview participants described a range of individualised coping mechanisms when experiencing moral distress. In general, informal support mechanisms were preferred to more formal arrangements. This study took place before the COVID-19 pandemic and it is possible the immense pressures on UK ICU services has had further impact on the experience of moral distress. This should be recognised when considering how this study reflects the current welfare of UK ICU professionals.

The only other quantitative study of moral distress in UK ICUs to date also found moral distress was significantly associated with an intention to leave a post, a finding consistent with international literature.(16, 20, 31, 35) It is increasingly clear that the impact of moral distress appears damaging to staff retention and should be considered by employers.(10, 16) Colville *et al.* were unable to detect a difference in moral distress scores between nurses and doctors and highlight the confounding impact of gender differences. Our larger study found that moral distress is greater in nurses and this difference remained statistically significant after accounting for differences in gender distributions. This finding is consistent with international studies showing that nurses report greater moral distress than doctors.(20, 33, 35) It is also notable that nurses had a significantly greater intention to leave the profession, including in adjusted analyses. Indeed, 37% of nurses included in our study indicated they were considering leaving their current post due to moral distress, compared with 15% of doctors, a concerning finding that potentially has staff retention and workplace planning implications.

1  
2  
3 Overall moral distress scores were higher in our study than similar research in the USA.(33) Mean  
4 moral distress scores were higher in our study across all profession subgroups.(33) At present, there  
5 is no other international use of this most up to date quantitative moral distress measure (the MMD-  
6 HP) to make further comparisons. Past studies have used the previous version (the Moral Distress  
7 Scale – Revised) which uses 21 items, compared with the MMD-HP's 27, therefore precluding direct  
8 comparison. A recent study in Ireland during the COVID-19 pandemic does use the MMD-HP, but only  
9 selected items and so overall comparisons cannot be made.(36) Almost all highly ranked individual  
10 item composite scores were higher in our study than that in the USA.(33) This was most notable for  
11 resource-related items, specifically compromised care due to lack of resources/equipment/bed  
12 capacity, where the composite moral distress score was substantially higher in our UK study. This was  
13 ranked the second highest item by moral distress score in our study for both doctors and nurses, but  
14 ranked fifth in a comparative study in the USA.(33) This could reflect differences in healthcare delivery  
15 and the provision of critical care beds.(37-39) This high signal of moral distress raises a worrying  
16 concern that sub-optimal care may be being delivered due to resource constraints. This study is unable  
17 to determine if this is occurring, nevertheless the high levels of moral distress due to resource-related  
18 issues should be noted.  
19

20  
21 It is increasingly clear that moral distress is widespread and detrimental within intensive care.(40-42)  
22 A key question is therefore how to prevent and mitigate it. Given our finding of lack of agency as a  
23 cause of moral distress, one preventive strategy would be to improve agency and empower clinical  
24 staff to speak out. Hamric *et al.* report how a moral distress consultation service was successful in  
25 empowering staff in situations where they had felt unheard or powerless.(43)  
26  
27

28  
29 Our qualitative findings suggest that interventions aimed at combating moral distress require a  
30 tailored approach that recognises the individualistic nature of coping with moral distress.  
31 Individualised informal support appears the most common coping strategy and is often effective if it  
32 takes place in an organisational culture that provides a supportive environment. Our participants  
33 frequently reported that smaller ICUs were more supportive and more able to permit informal coping  
34 compared with larger ICUs. This is noteworthy as UK intensive care services move towards  
35 regionalisation with larger ICUs on a "hub and spoke" model to meet increasing care demands.(44) It  
36 may be possible to replicate the benefits of smaller units at larger ICUs by working in smaller, close-  
37 knit teams caring for "pods" of beds within the larger ICU. Embedding senior professionals who are  
38 nominated to facilitate discussion to cope with moral distress within these teams could be beneficial.  
39 Supporting effective coping could produce a positive feedback loop that encourages staff retention,  
40 therefore promoting a close-knit team and allowing formation of the staff relationships which appear  
41  
42  
43  
44  
45  
46  
47  
48  
49  
50  
51  
52  
53  
54  
55  
56  
57  
58  
59  
60

1  
2  
3 so important in facilitating informal coping. Conversely, failure to control moral distress could produce  
4 a negative spiral due to its deleterious effects on career decisions.(14, 16, 20)  
5  
6

7 Our study has several limitations. Firstly, the study is at risk of selection bias. Those experiencing high  
8 levels of moral distress may be unwilling to participate and relive their experiences, or alternatively  
9 those with low levels of moral distress may not appreciate its value and not take part. We only  
10 included those currently working in ICU and so cannot capture those that may have left ICU due to  
11 high levels of moral distress. We attempted to improve external validity by including multiple ICUs  
12 which had different operational characteristics. Purposive sampling ensured the interview sample  
13 reflected the total questionnaire sample and included representation of all hospitals, a range of  
14 professions, seniority, age and gender. Secondly, our study includes more nurses than other  
15 professions, however this reflects the distribution of ICU professions.(21) Thirdly, this study is a  
16 snapshot and may be influenced by how the participant is feeling at that time, or what clinical cases  
17 are present on their unit. Moral distress may be a reactive process and be influenced by experiences  
18 at that point in time.(45) It is possible that moral distress may fluctuate and change as the clinical case-  
19 mix within an ICU changes. It remains unknown how moral distress changes over time and further  
20 study is warranted.  
21  
22  
23  
24  
25  
26  
27  
28  
29  
30

31 This study highlights the widespread nature of moral distress in UK ICUs and across ICU professions.  
32 Moral distress is worst in situations related to delivery of aggressive treatment perceived as futile or  
33 not in the patient's best interests, and this finding is consistent with previous international research.  
34 Moral distress in UK ICUs appears to be more frequently experienced than in North America, in  
35 particular moral distress related to resource constraints. Moral distress is greatest in nurses and is  
36 independently associated with an intention to leave the profession, both at present and in the past.  
37 This study took place before the COVID-19 pandemic and even at that time one third of participants  
38 were considering leaving their current position. Moral distress is therefore a pressing problem for NHS  
39 trusts and policymakers seeking to retain and support an effective ICU workforce. In order to provide  
40 a healthy and sustainable intensive care workforce for the future it will be important to acknowledge  
41 moral distress and provide environments that are supportive to staff and facilitate coping strategies.  
42 Policy decisions on the provision of intensive care services should take into account the importance of  
43 supportive environments and close-knit teams in facilitating coping with the almost inevitable moral  
44 distress and psychological pressures associated with working in intensive care.  
45  
46  
47  
48  
49  
50  
51  
52  
53  
54  
55  
56  
57  
58  
59  
60

## Acknowledgments

We are grateful for the expert statistical support provided by Dr Georgios Bouliotis. We sincerely thank the healthcare professionals for voluntarily participating in this research and giving their time for interviews. The National Institute of Academic Anaesthesia kindly supported this study with an Association of Anaesthetists/*Anaesthesia* research grant awarded to AJB. The NIHR Clinical Research Network adopted this study onto their portfolio and the support of the research teams at all sites is greatly appreciated. We are very grateful for the PPI input and contributions made by the University Hospitals Birmingham Clinical Research Ambassador Group.

## Ethics approval

This study involves human participants but an Ethics Committee(s) or Institutional Board(s) exempted this study. Approvals gained from the NHS Health Research Authority (IRAS:238379). University Hospitals Coventry and Warwickshire NHS Trust acted as study sponsor. Local approvals from each study site Research & Development department.

## Contribution statement

Study design: AJB, JY, AMS, CB. Study conduct: AJB, JY, AMS, CB. Data analysis: AJB, AMS. Drafting of manuscript: AJB, AMS. Review of manuscript: AJB, JY, AMS, CB.

## Funding statement

This work was supported by an Association of Anaesthetists/*Anaesthesia* research grant administered by the National Institute of Academic Anaesthesia. Grant number NIAA19R102.

## Competing interest

AJB is supported by an NIHR funded Academic Clinical Fellowship.

## Data sharing statement

Statistical code for analyses used R version 3.6.1 (R Foundation for Statistical Computing) are available on reasonable request.

## References

1. Dzau VJ, Kirch D, Nasca T. Preventing a Parallel Pandemic — A National Strategy to Protect Clinicians' Well-Being. *New England Journal of Medicine*. 2020;383(6):513-5.
2. Greenberg N, Docherty M, Gnanapragasam S, Wessely S. Managing mental health challenges faced by healthcare workers during covid-19 pandemic. *BMJ*. 2020;368:m1211.
3. Shapiro J, McDonald TB. Supporting Clinicians during Covid-19 and Beyond — Learning from Past Failures and Envisioning New Strategies. *New England Journal of Medicine*. 2020;383(27):e142.
4. Sheather J, Fidler H. Covid-19 has amplified moral distress in medicine. *BMJ*. 2021;372:n28.
5. British Medical Association. Moral distress and moral injury: recognising and tackling it for UK doctors. 2021.
6. NHS Health Education England. NHS Staff and Learners' Mental Wellbeing Commission report. 2019.
7. Hall LH, Johnson J, Watt I, Tsipa A, O'Connor DB. Healthcare Staff Wellbeing, Burnout, and Patient Safety: A Systematic Review. *PloS one*. 2016;11(7):e0159015-e.
8. McClelland L, Plunkett E, McCrossan R, Ferguson K, Fraser J, Gildersleve C, et al. A national survey of out-of-hours working and fatigue in consultants in anaesthesia and paediatric intensive care in the UK and Ireland. *Anaesthesia*. 2019;74(12):1509-23.
9. Lamiani G, Borghi L, Argentero P. When healthcare professionals cannot do the right thing: A systematic review of moral distress and its correlates. *Journal of health psychology*. 2017;22(1):51-67.
10. Fumis RRL, Junqueira Amarante GA, de Fátima Nascimento A, Vieira Junior JM. Moral distress and its contribution to the development of burnout syndrome among critical care providers. *Annals of intensive care*. 2017;7(1):71-.
11. Dzung E, Curtis JR. Understanding ethical climate, moral distress, and burnout: a novel tool and a conceptual framework. 2018;27(10):766-70.
12. Royal College of Anaesthetists. A report on the welfare, morale and experiences of anaesthetists in training: the need to listen. 2017.
13. Dodek PM, Cheung EO, Burns KE, Martin CM, Archambault PM, Lauzier F, et al. Moral Distress and Other Wellness Measures in Canadian Critical Care Physicians. *Annals of the American Thoracic Society*. 2020;24.
14. Elpern EH, Covert B, Kleinpell R. Moral distress of staff nurses in a medical intensive care unit. *American journal of critical care : an official publication, American Association of Critical-Care Nurses*. 2005;14(6):523-30.
15. Jameton A. *Nursing practice: The ethical issues*: New Jersey: Prentice Hall Inc; 1984.
16. Hamric AB. Empirical research on moral distress: issues, challenges, and opportunities. *HEC forum : an interdisciplinary journal on hospitals' ethical and legal issues*. 2012;24(1):39-49.
17. Morley G, Ives J, Bradbury-Jones C, Irvine F. What is 'moral distress'? A narrative synthesis of the literature. *Nursing ethics*. 2017;26(3):646-62.
18. Choe K, Kang Y, Park Y. Moral distress in critical care nurses: a phenomenological study. *Journal of advanced nursing*. 2015;71(7):1684-93.
19. Morley G, Bradbury-Jones C, Ives J. What is 'moral distress' in nursing? A feminist empirical bioethics study. *Nursing ethics*. 2020;27(5):1297-314.
20. Dodek PM, Wong H, Norena M, Ayas N, Reynolds SC, Keenan SP, et al. Moral distress in intensive care unit professionals is associated with profession, age, and years of experience. *Journal of critical care*. 2016;31(1):178-82.
21. The Faculty of Intensive Care Medicine, Intensive Care Society. Guidelines for the provision of intensive care services. Edition 2. 2019.
22. Sprung CL, Cohen SL, Sjøkvist P, Baras M, Bulow HH, Hovilehto S, et al. End-of-life practices in European intensive care units: the Ethicus Study. *Jama*. 2003;290(6):790-7.
23. Corley MC. Moral distress of critical care nurses. *American journal of critical care : an official publication, American Association of Critical-Care Nurses*. 1995;4(4):280-5.

- 1
- 2
- 3
- 4 24. Rodney P. Moral distress in critical care nursing. *Canadian critical care nursing journal*. 1988;5(2):9-11.
- 5
- 6 25. Hamric AB, Borchers CT, Epstein EG. Development and Testing of an Instrument to Measure Moral Distress in Healthcare Professionals. *AJOB Primary Research*. 2012;3(2):1-9.
- 7
- 8 26. Henrich NJ, Dodek PM, Alden L, Keenan SP, Reynolds S, Rodney P. Causes of moral distress in the intensive care unit: A qualitative study. *Journal of critical care*. 2016;35:57-62.
- 9
- 10 27. Schwenzer KJ, Wang L. Assessing moral distress in respiratory care practitioners. *Critical care medicine*. 2006;34(12):2967-73.
- 11
- 12 28. Monrouxe LV, Rees CE, Dennis I, Wells SE. Professionalism dilemmas, moral distress and the healthcare student: insights from two online UK-wide questionnaire studies. *BMJ open*. 2015;5(5):e007518.
- 13
- 14 29. Quek CWN, Ong RRS, Wong RSM, Chan SWK, Chok AK-L, Shen GS, et al. Systematic scoping review on moral distress among physicians. *BMJ open*. 2022;12(9):e064029.
- 15
- 16 30. Pathman DE, Sonis J, Rauner TE, Alton K, Headlee AS, Harrison JN. Moral distress among clinicians working in US safety net practices during the COVID-19 pandemic: a mixed methods study. *BMJ open*. 2022;12(8):e061369.
- 17
- 18 31. Colville G, Dawson D, Rabinthiran S, Chaudry-Daley Z, Perkins-Porras L. A survey of moral distress in staff working in intensive care in the UK. *Journal of the Intensive Care Society*. 2018.
- 19
- 20 32. St Ledger U, Begley A, Reid J, Prior L, McAuley D, Blackwood B. Moral distress in end-of-life care in the intensive care unit. *Journal of advanced nursing*. 2013;69(8):1869-80.
- 21
- 22 33. Epstein EG, Whitehead PB, Prompahakul C, Thacker LR, Hamric AB. Enhancing Understanding of Moral Distress: The Measure of Moral Distress for Health Care Professionals. *AJOB Empir Bioeth*. 2019;10(2):113-24.
- 23
- 24 34. Silverman D. *Qualitative Research*: SAGE; 2016.
- 25
- 26 35. Whitehead PB, Herbertson RK, Hamric AB, Epstein EG, Fisher JM. Moral distress among healthcare professionals: report of an institution-wide survey. *Journal of nursing scholarship : an official publication of Sigma Theta Tau International Honor Society of Nursing*. 2015;47(2):117-25.
- 27
- 28 36. Ffrench-O'Carroll R, Feeley T, Tan MH, Magner C, L'Estrange K, Efrimescu C-I, et al. Psychological impact of COVID-19 on staff working in paediatric and adult critical care. *British journal of anaesthesia*. 2020:S0007-912(20)30824-2.
- 29
- 30 37. Wallace DJ, Angus DC, Seymour CW, Barnato AE, Kahn JM. Critical Care Bed Growth in the United States. A Comparison of Regional and National Trends. *American journal of respiratory and critical care medicine*. 2014;191(4):410-6.
- 31
- 32 38. Wong DJN, Popham S, Wilson AM, Barneto LM, Lindsay HA, Farmer L, et al. Postoperative critical care and high-acuity care provision in the United Kingdom, Australia, and New Zealand. *British journal of anaesthesia*. 2019;122(4):460-9.
- 33
- 34 39. Böhm K, Schmid A, Götze R, Landwehr C, Rothgang H. Five types of OECD healthcare systems: Empirical results of a deductive classification. *Health Policy*. 2013;113(3):258-69.
- 35
- 36 40. Oh Y, Gastmans C. Moral distress experienced by nurses:A quantitative literature review. *Nursing ethics*. 2015;22(1):15-31.
- 37
- 38 41. Morley G, Ives J, Bradbury-Jones C, Irvine F. What is 'moral distress'? A narrative synthesis of the literature. *Nursing ethics*. 2019;26(3):646-62.
- 39
- 40 42. Tigard DW. Rethinking moral distress: conceptual demands for a troubling phenomenon affecting health care professionals. *Med Health Care Philos*. 2018;21(4):479-88.
- 41
- 42 43. Hamric AB, Epstein EG. A Health System-wide Moral Distress Consultation Service: Development and Evaluation. *HEC forum : an interdisciplinary journal on hospitals' ethical and legal issues*. 2017;29(2):127-43.
- 43
- 44 44. Suntharalingam G, Handy J, Walsh A. Regionalisation of critical care: can we sustain an intensive care unit in every hospital? *Anaesthesia*. 2014;69(10):1069-73.
- 45
- 46 45. Jameton A. Dilemmas of moral distress: moral responsibility and nursing practice. *AWHONN's clinical issues in perinatal and women's health nursing*. 1993;4(4):542-51.
- 47
- 48
- 49
- 50
- 51
- 52
- 53
- 54
- 55
- 56
- 57
- 58
- 59
- 60

1  
2  
3  
4  
5  
6  
7  
8  
9  
10  
11  
12  
13  
14  
15  
16  
17  
18  
19  
20  
21  
22  
23  
24  
25  
26  
27  
28  
29  
30  
31  
32  
33  
34  
35  
36  
37  
38  
39  
40  
41  
42  
43  
44  
45  
46  
47  
48  
49  
50  
51  
52  
53  
54  
55  
56  
57  
58  
59  
60

For peer review only



**Figures**

**Figure 1** Relationship between moral distress total and demographic/professional variables. F=Female, M=Male, DGH=District General Hospital, TCH=Tertiary Care Hospital. N=213 as 14 questionnaires excluded due to missing responses preventing calculation of the moral distress score

For peer review only

1  
2  
3  
4  
5  
6  
7  
8  
9  
10  
11  
12  
13  
14  
15  
16  
17  
18  
19  
20  
21  
22  
23  
24  
25  
26  
27  
28  
29  
30  
31  
32  
33  
34  
35  
36  
37  
38  
39  
40  
41  
42  
43  
44  
45  
46  
47  
48  
49  
50  
51  
52  
53  
54  
55  
56  
57  
58  
59  
60

For peer review only

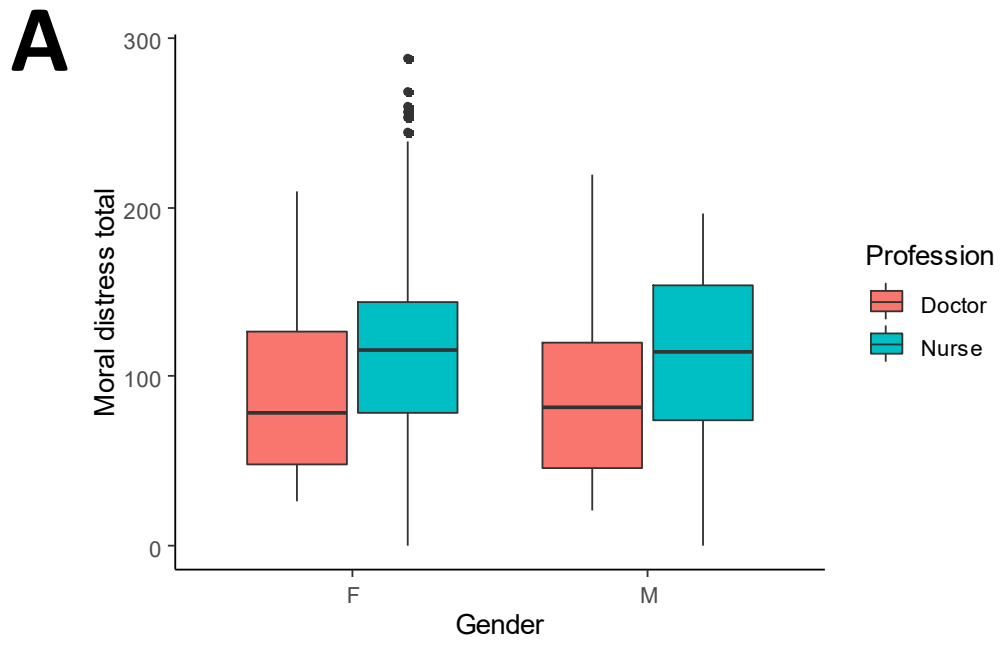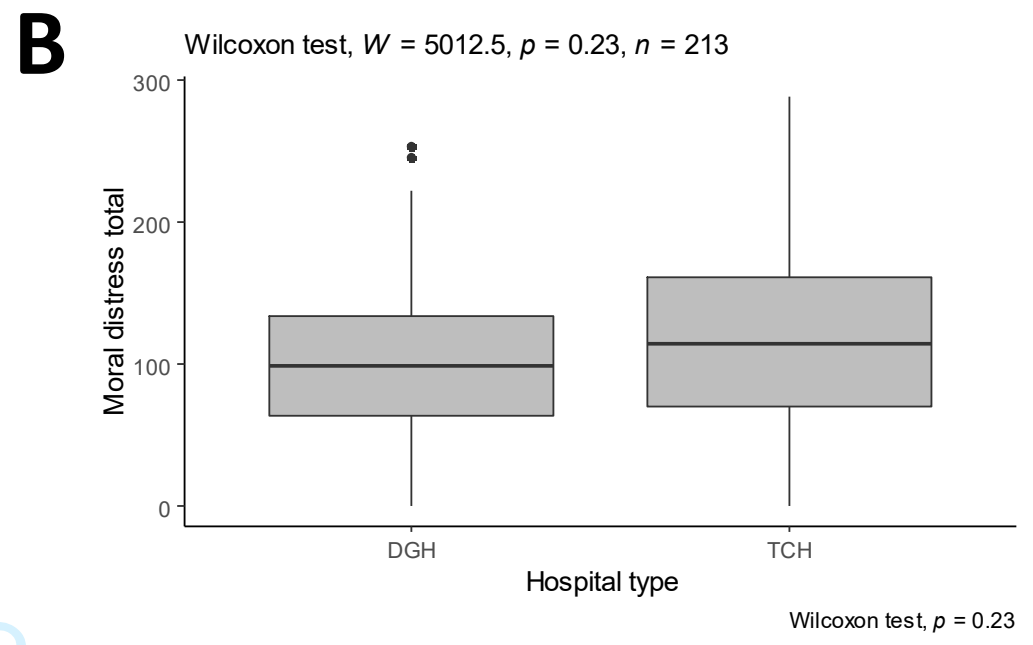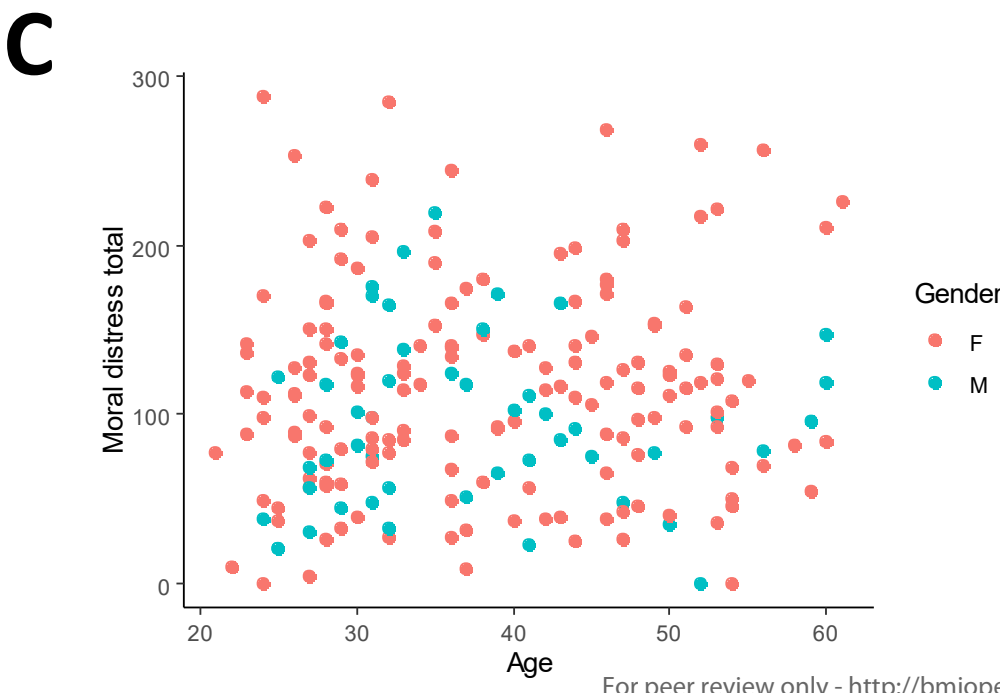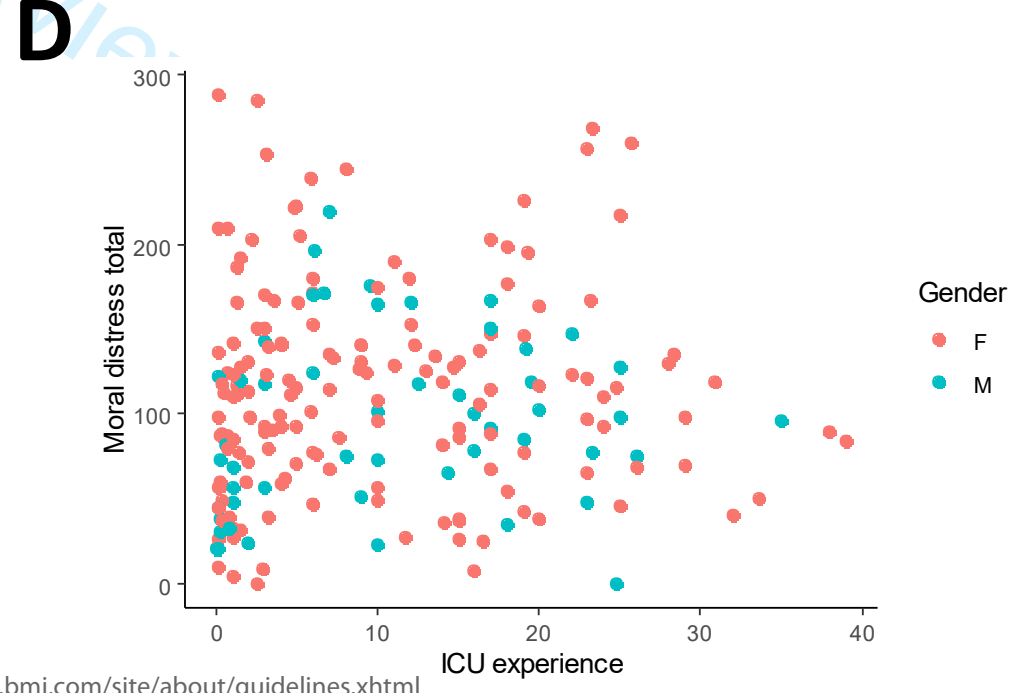

ID:

Demographics

# Moral distress amongst intensive care unit professions in the UK

Moral distress happens when we *cannot do* what we believe is the *ethically right thing* to do because of barriers or constraints.

Work in North America tells us this is a widespread experience and is damaging to healthcare professionals. However, this is poorly studied in the UK and we are interested your experiences.

Profession (please circle): Doctor / Nurse / ACCP / Physiotherapist / Other (please specify).....

Place of work (please circle): BHH / GHH / QEHB / UHCW / Other (please specify) .....

Age:                      Gender:                      Grade:

Years of working experience:

Experience in ICU (years and months):

**Many thanks for your interest in taking part in this study. Your responses are anonymous.**

**Please complete the questionnaire overleaf as accurately as possible.**

**This research is funded by the National Institute of Academic Anaesthesia (NIAA), supported by the NHS National Institute for Health Research (NIHR), and conducted by researchers at the University of Warwick.**

**This research is independent of your hospital trust**

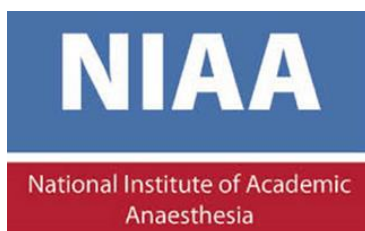

SUPPORTED BY

**NIHR** | National Institute  
for Health Research

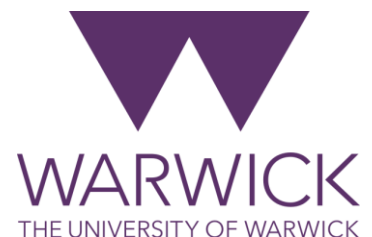

ID:

Demographics

**We are inviting participants to undertake a semi-structured interview to further investigate moral distress. This will take approximately 30 minutes. We are interested in your direct experiences of moral distress.**

**We will do this at a time that is convenient for the participant. If you are willing to take part, please leave your contact details below and we will contact you to arrange a convenient time and place.**

Name:

Email:

Mobile number:

For peer review only

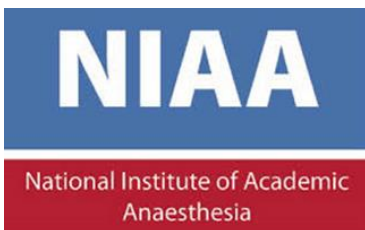

SUPPORTED BY

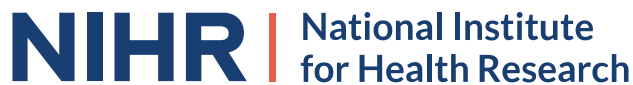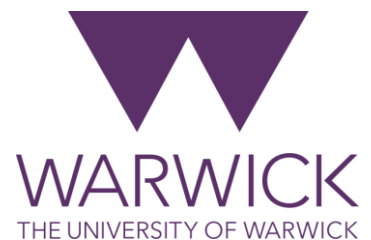

ID:

## Measure of Moral Distress – Healthcare Professionals (MMD-HP)

**Moral distress occurs when professionals cannot carry out what they believe to be ethically appropriate actions because of constraints or barriers. This survey lists situations that occur in clinical practice. If you have experienced these situations they may or may not have been morally distressing to you. Please indicate how frequently you have experienced each item. Also, rank how distressing these situations are for you. If you have never experienced a particular situation, select “0” (never) for frequency. Even if you have not experienced a situation, please indicate how distressed you would be if it occurred in your practice. Note that you will respond to each item by checking the appropriate column for two dimensions with a ●: *Frequency and Level of Distress.***

|                                                                                                                                                                  | Frequency |   |                 |   |   | Level of Distress |   |                  |   |   |
|------------------------------------------------------------------------------------------------------------------------------------------------------------------|-----------|---|-----------------|---|---|-------------------|---|------------------|---|---|
|                                                                                                                                                                  | Never     |   | Very frequently |   |   | None              |   | Very distressing |   |   |
|                                                                                                                                                                  | 0         | 1 | 2               | 3 | 4 | 0                 | 1 | 2                | 3 | 4 |
| <i>Example entry:</i><br>Witness healthcare providers giving “false hope” to a patient or family.                                                                |           |   | ●               |   |   |                   |   |                  | ● |   |
| 1. Witness healthcare providers giving “false hope” to a patient or family.                                                                                      |           |   |                 |   |   |                   |   |                  |   |   |
| 2. Follow the family’s insistence to continue aggressive treatment even though I believe it is not in the best interest of the patient.                          |           |   |                 |   |   |                   |   |                  |   |   |
| 3. Feel pressured to order or carry out orders for what I consider to be unnecessary or inappropriate tests and treatments.                                      |           |   |                 |   |   |                   |   |                  |   |   |
| 4. Be unable to provide optimal care due to pressures from administrators or insurers to reduce costs.                                                           |           |   |                 |   |   |                   |   |                  |   |   |
| 5. Continue to provide aggressive treatment for a person who is most likely to die regardless of this treatment when no one will make a decision to withdraw it. |           |   |                 |   |   |                   |   |                  |   |   |
| 6. Be pressured to avoid taking action when I learn that a physician, nurse, or other team colleague has made a medical error and does not report it.            |           |   |                 |   |   |                   |   |                  |   |   |
| 7. Be required to care for patients whom I do not feel qualified to care for.                                                                                    |           |   |                 |   |   |                   |   |                  |   |   |
| 8. Participate in care that causes unnecessary suffering or does not adequately relieve pain or symptoms.                                                        |           |   |                 |   |   |                   |   |                  |   |   |
| 9. Watch patient care suffer because of a lack of provider continuity.                                                                                           |           |   |                 |   |   |                   |   |                  |   |   |
| 10. Follow a physician’s or family member’s request not to discuss the patient’s prognosis with the patient/family.                                              |           |   |                 |   |   |                   |   |                  |   |   |
| 11. Witness a violation of a standard of practice or a code of ethics and not feel sufficiently supported to report the violation.                               |           |   |                 |   |   |                   |   |                  |   |   |
| 12. Participate in care that I do not agree with, but do so because of fears of litigation.                                                                      |           |   |                 |   |   |                   |   |                  |   |   |
| 13. Be required to work with other healthcare team members who are not as competent as patient care requires.                                                    |           |   |                 |   |   |                   |   |                  |   |   |
| 14. Witness low quality of patient care due to poor team communication.                                                                                          |           |   |                 |   |   |                   |   |                  |   |   |
| 15. Feel pressured to ignore situations in which patients have not been given adequate information to ensure informed consent.                                   |           |   |                 |   |   |                   |   |                  |   |   |

ID:

|                                                                                                                  | Frequency |   |                 |   |   | Level of Distress |   |                  |   |   |
|------------------------------------------------------------------------------------------------------------------|-----------|---|-----------------|---|---|-------------------|---|------------------|---|---|
|                                                                                                                  | Never     |   | Very frequently |   |   | None              |   | Very distressing |   |   |
|                                                                                                                  | 0         | 1 | 2               | 3 | 4 | 0                 | 1 | 2                | 3 | 4 |
| 16. Be required to care for more patients than I can safely care for.                                            |           |   |                 |   |   |                   |   |                  |   |   |
| 17. Experience compromised patient care due to lack of resources/equipment/bed capacity.                         |           |   |                 |   |   |                   |   |                  |   |   |
| 18. Experience lack of administrative action or support for a problem that is compromising patient care.         |           |   |                 |   |   |                   |   |                  |   |   |
| 19. Have excessive documentation requirements that compromise patient care.                                      |           |   |                 |   |   |                   |   |                  |   |   |
| 20. Fear retribution if I speak up.                                                                              |           |   |                 |   |   |                   |   |                  |   |   |
| 21. Feel unsafe/bullied amongst my own colleagues.                                                               |           |   |                 |   |   |                   |   |                  |   |   |
| 22. Be required to work with abusive patients/family members who are compromising quality of care.               |           |   |                 |   |   |                   |   |                  |   |   |
| 23. Feel required to overemphasize tasks and productivity or quality measures at the expense of patient care.    |           |   |                 |   |   |                   |   |                  |   |   |
| 24. Be required to care for patients who have unclear or inconsistent treatment plans or who lack goals of care. |           |   |                 |   |   |                   |   |                  |   |   |
| 25. Work within power hierarchies in teams, units, and my institution that compromise patient care.              |           |   |                 |   |   |                   |   |                  |   |   |
| 26. Participate on a team that gives inconsistent messages to a patient/family.                                  |           |   |                 |   |   |                   |   |                  |   |   |
| 27. Work with team members who do not treat vulnerable or stigmatized patients with dignity and respect.         |           |   |                 |   |   |                   |   |                  |   |   |
| If there are other situations in which you have felt moral distress, please write and score them here:           |           |   |                 |   |   |                   |   |                  |   |   |
|                                                                                                                  |           |   |                 |   |   |                   |   |                  |   |   |
|                                                                                                                  |           |   |                 |   |   |                   |   |                  |   |   |

Have you ever left or considered leaving a clinical position due to moral distress?

- No, I have never considered leaving or left a position.  
 Yes, I considered leaving but did not leave.  
 Yes, I left a position.

Are you considering leaving your position now?

- Yes  
 No

**Supplementary Table 1** Interview participant demographics

| Characteristic                             | N=15                                      |
|--------------------------------------------|-------------------------------------------|
| Mean age $\pm$ SD – years                  | 40.6 $\pm$ 9.1                            |
| Gender – no. (%)                           |                                           |
| Female                                     | 9 (60.0%)                                 |
| Male                                       | 5 (40.0%)                                 |
| Profession – no. (%)                       |                                           |
| Nurse                                      | 6 (40.0%)                                 |
| Band 5                                     | 2                                         |
| Band 7                                     | 3                                         |
| Band 8                                     | 1                                         |
| Doctor                                     | 5 (33.3%)                                 |
| Core trainee level                         | 2                                         |
| Specialty trainee level                    | 2                                         |
| Consultant                                 | 1                                         |
| Advanced Critical Care Practitioner (ACCP) | 2 (13.3%)                                 |
| Other                                      | 2 (13.3%)                                 |
| Mean ICU experience $\pm$ SD – years       | 11.1 $\pm$ 9.2                            |
| Workplace – no. (%)                        |                                           |
| Site A                                     | 4 (26.7%)                                 |
| Site B                                     | 5 (33.3%)                                 |
| Site C                                     | 6 (40.0%) (3 (20.0%) work at Site D also) |



**Supplementary Table 2** Top fifteen items ranked by composite moral distress score for nurses and doctors

| Situation                                                                                                                                                     | Nurses         |      | Doctors        |      |
|---------------------------------------------------------------------------------------------------------------------------------------------------------------|----------------|------|----------------|------|
|                                                                                                                                                               | Mean (SD)      | Rank | Mean (SD)      | Rank |
| Continue to provide aggressive treatment for a person who is most likely to die regardless of this treatment when no one will make a decision to withdraw it. | 9.24<br>(4.62) | 1    | 5.98<br>(3.38) | 4    |
| Experience compromised patient care due to lack of resources/equipment/bed capacity.                                                                          | 8.1<br>(5.15)  | 2    | 7.29<br>(5.25) | 2    |
| Have excessive documentation requirements that compromise patient care.                                                                                       | 7.51<br>(5.46) | 3    | 3.92<br>(3.99) | 8    |
| Follow the family's insistence to continue aggressive treatment even though I believe it is not in the best interest of the patient.                          | 7.45<br>(4.24) | 4    | 7.45<br>(4.40) | 1    |
| Be required to work with abusive patients/family members who are compromising quality of care.                                                                | 6.82<br>(4.82) | 5    | 4.03<br>(3.93) | 7    |
| Be required to care for more patients than I can safely care for.                                                                                             | 6.60<br>(4.95) | 6    | 6.02<br>(5.30) | 3    |
| Be required to work with other healthcare team members who are not as competent as patient care requires.                                                     | 6.25<br>(4.87) | 7    | 3.02<br>(3.57) | 15   |
| Witness healthcare providers giving "false hope" to a patient or family.                                                                                      | 5.62<br>(4.05) | 8    | 4.82<br>(3.73) | 6    |
| Be required to care for patients who have unclear or inconsistent treatment plans or who lack goals of care.                                                  | 5.57<br>(4.71) | 9    | 3.75<br>(3.37) | 10   |
| Feel pressured to order or carry out orders for what I consider to be unnecessary or inappropriate tests and treatments.                                      | 5.31<br>(4.17) | 10   | 3.88<br>(3.25) | 9    |
| Experience lack of administrative action or support for a problem that is compromising patient care.                                                          | 4.89<br>(4.53) | 11   | 5.10<br>(5.33) | 5    |
| Witness low quality of patient care due to poor team communication.                                                                                           | 4.79<br>(4.11) | 12   | 3.30<br>(2.72) | 14   |
| Watch patient care suffer because of a lack of provider continuity.                                                                                           | 4.57<br>(4.62) | 13   | 3.37<br>(3.30) | 13   |
| Participate on a team that gives inconsistent messages to a patient/family.                                                                                   | 3.84<br>(3.86) | 14   | 2.10<br>(2.45) | 19   |
| Fear retribution if I speak up.                                                                                                                               | 3.72<br>(4.74) | 15   | 2.20<br>(3.74) | 17   |

**Supplementary Table 3** Logistic regression model variables and association with the ordinal dependent variable of intention to leave previous post due to moral distress (No, Considered but didn't leave, Left) in univariable and multiple analyses. Italics and \* indicate statistically significant association. (OR=Odds Ratio, CI=Confidence Interval)

| Variable                        | Univariable OR<br>(95% CI) | p-value    | Multivariable OR<br>(95% CI) | p-value  |
|---------------------------------|----------------------------|------------|------------------------------|----------|
| Age (per year)                  | 1.021 (0.994 – 1.049)      | 0.128      | 1.040 (0.992 – 1.093)        | 0.106    |
| ICU experience (per year)       | 1.018 (0.989 – 1.049)      | 0.226      | 0.965 (0.914 – 1.019)        | 0.201    |
| Gender                          |                            |            |                              |          |
| <i>Male</i>                     | Ref                        | Ref        | Ref                          | Ref      |
| <i>Female</i>                   | 1.914 (1.025 – 3.629)      | 0.0436*    | 1.188 (0.554 – 2.560)        | 0.659    |
| Profession                      |                            |            |                              |          |
| <i>Other</i>                    | Ref                        | Ref        | Ref                          | Ref      |
| <i>Nurse</i>                    | 1.845 (1.017 – 3.386)      | 0.0455*    | 1.460 (0.705 – 3.059)        | 0.310    |
| Hospital type                   |                            |            |                              |          |
| <i>District general</i>         | Ref                        | Ref        | Ref                          | Ref      |
| <i>Tertiary care</i>            | 1.707 (1.002 – 2.929)      | 0.0504     | 1.738 (0.937 – 3.249)        | 0.0805   |
| Moral distress total (per unit) | 1.010 (1.006 – 1.015)      | 0.0000113* | 1.009 (1.004 – 1.014)        | 0.00122* |

**Supplementary Table 4** Illustrative quotes of participant responses to moral distress.

| Response to moral distress | Quotation example                                                                                                                                                                                                                                                                                                                                                                                                                                                                                                                                                                                                                                                                                                                                                    |
|----------------------------|----------------------------------------------------------------------------------------------------------------------------------------------------------------------------------------------------------------------------------------------------------------------------------------------------------------------------------------------------------------------------------------------------------------------------------------------------------------------------------------------------------------------------------------------------------------------------------------------------------------------------------------------------------------------------------------------------------------------------------------------------------------------|
| Frustration, Anger         | <p><i>"I do find it stressful, I do get quite angry, not in the moment but often, you know, I feel very grumpy or angry walking back to the ITU having done it all. There is just a great frustration." (Doctor 4)</i></p> <p><i>"And I feel like almost angry at the family for, and then that doesn't feel right, that feels like a really unwelcome feeling to feel angry at this poor family who have had a terrible thing happen to them and just love their loved one and I kind of see that. But it just goes on and on and on and it feels like torture for her, for everybody that looks after her, and it feels like something criminal, you know, it feels worse than" (Doctor 5)</i></p>                                                                 |
| Upset                      | <p><i>"So at the time I feel like there are tears like behind my eyes and I will feel that kind of like ache in your throat that you get and I feel nauseated and I just feel like just exhausted by it really, you know, you keep trying to apologise to the family, trying to look after the patient as best you can. You know, try and apologise, you know, just kind of try to soften, you try to be the buffer between the situation and the patient and the family but you suffer for that don't you?" (Doctor 5)</i></p> <p><i>"Yeah definitely, we all sat in one of the side rooms together and everyone had the opportunity to express their feelings, most of us had a good cry, you know, that sort of thing." (Nurse 2)</i></p>                         |
| Deflation, Dissatisfaction | <p><i>"So when I was driving home I felt a bit deflated like I hadn't really done, like I hadn't really done the very best that I could have done although it was quite a messy, it was a bit of a messy situation. And of course lots of clinical situations are very messy, especially when there is more than one team involved and that sort of thing. So I just had a vague sense of feeling dissatisfaction and I should have really known that information before." (Nurse 2)</i></p>                                                                                                                                                                                                                                                                         |
| Worry                      | <p><i>"I would then go home and pick apart my decisions and ruminate and kind of sabotage myself. And then I can't sleep and then I go to work the next day knackered and I worry that my decision making is worse then and then you spiral don't you I think." (Doctor 5)</i></p>                                                                                                                                                                                                                                                                                                                                                                                                                                                                                   |
| Relatable case             | <p><i>"You know, you wouldn't want if for yourself or your own family and yet it keeps going on, you know, it's kind of difficult to witness really. And you feel a bit like a perpetrator of it I think." (Doctor 5)</i></p>                                                                                                                                                                                                                                                                                                                                                                                                                                                                                                                                        |
| Avoidance of interaction   | <p><i>"...my sympathy for the family has deteriorated over time... They come in and I don't like to look at them, so I don't look at them. And that feels inhuman and I think what's become of me, where is my humanity? But it's not that I don't care it's just the situation has got beyond me, that I just think I don't know how to respond to this anymore so I just don't look... that's terrible isn't it? So it is hard, it's really hard." (Doctor 5)</i></p> <p><i>"Yeah, even in handover she is kind of not mentioned really... yeah definitely emotionally like for self-protection I have kind of switched off a bit." (Doctor 5)</i></p>                                                                                                             |
| Impact on career decisions | <p><i>"So the NHS for that I think that the amount of trauma that, or emotional trauma that we see that we absorb, that we take on, we don't get the right amount of, in our particular role it has a shelf life of two to four years." (Nurse 3)</i></p> <p><i>"I have previously actually thought about dual specialising in anaesthesia and intensive care. But my most recent job in intensive care has most definitely made me decide not to. But one of the reasons being in my experience has just been, I don't think it's one I would be able to continue and a career that I would be able to continue and still actually remain vaguely sane... That's why a lot of us don't really want to go into it, because it's soul destroying." (Doctor 2)</i></p> |

|                   |                                                                                                                                                                                                                                                                                                                                                                                                                                                                                                                                                                                                                                                                                                                                                                                                                                                                  |
|-------------------|------------------------------------------------------------------------------------------------------------------------------------------------------------------------------------------------------------------------------------------------------------------------------------------------------------------------------------------------------------------------------------------------------------------------------------------------------------------------------------------------------------------------------------------------------------------------------------------------------------------------------------------------------------------------------------------------------------------------------------------------------------------------------------------------------------------------------------------------------------------|
| Changes over time | <p>1<br/>2<br/>3<br/>4<br/>5<br/>6<br/>7<br/>8</p> <p><i>"The more experience you have definitely the easier it is but I have been really conscious of the burden that the job has on me and kind of being careful and protecting myself. Because if you want longevity you have to understand what it is doing to yourself and have ways of dealing with that." (ACCP 2)</i></p> <p><i>"I don't know whether this is just me, but personally I feel like I am less able to cope with it now, I get far more emotional now and upset by things then I did when I first started working in critical care... I think probably because of my age, I relate to a lot of the patients now that are either in a similar age range to myself or younger patients that we have that are in a similar age bracket to my children, it really resonates." (Nurse 5)</i></p> |
|-------------------|------------------------------------------------------------------------------------------------------------------------------------------------------------------------------------------------------------------------------------------------------------------------------------------------------------------------------------------------------------------------------------------------------------------------------------------------------------------------------------------------------------------------------------------------------------------------------------------------------------------------------------------------------------------------------------------------------------------------------------------------------------------------------------------------------------------------------------------------------------------|

9  
10  
11  
12  
13  
14  
15  
16  
17  
18  
19  
20  
21  
22  
23  
24  
25  
26  
27  
28  
29  
30  
31  
32  
33  
34  
35  
36  
37  
38  
39  
40  
41  
42  
43  
44  
45  
46

For peer review only

**Supplementary Table 5** Illustrative quotes from participant descriptions of coping with moral distress

| Emotion                          | Quotation example                                                                                                                                                                                                                                                                                                                                                                                                                                                                                                                                                                                                                                                                                                                                                                                                                                                                                                                                                                     |
|----------------------------------|---------------------------------------------------------------------------------------------------------------------------------------------------------------------------------------------------------------------------------------------------------------------------------------------------------------------------------------------------------------------------------------------------------------------------------------------------------------------------------------------------------------------------------------------------------------------------------------------------------------------------------------------------------------------------------------------------------------------------------------------------------------------------------------------------------------------------------------------------------------------------------------------------------------------------------------------------------------------------------------|
| Personal reflection              | <p><i>"I think I just reflect constantly anyway, I don't know if everyone does, I imagine most of us do... I generally just do it in my head when I'm exercising I'll tend to think about, that went well, or that didn't go quite so well, what can I do to improve that next time. No, it's not something I think, right I need to go and meditate because that's upset me or whatever." (Other 2)</i></p> <p><i>"Yeah I think the moment you make anything mandatory I think you lose quite a lot of the value... So I think it has to be voluntary, I think it has to be something people do because they recognise it for its own value." (Doctor 3)</i></p>                                                                                                                                                                                                                                                                                                                     |
| Mental compartmentalisation      | <p><i>"So I tend to compartmentalise work and home, because I have had periods of time before where I have been really, really distressed and it just, it's no good for your home life, so I've kind of, I box things off. I don't know if that is the right way of doing it or not but that's what I tend to do." (Nurse 2)</i></p> <p><i>"I drive quite a long distance to work and back, so mine sort of goes in the car. I have a little reflection and sometimes a little blurt in the car and then by time I've walked through the house, picked the dogs up and walk out, it's gone." (ACCP 1)</i></p>                                                                                                                                                                                                                                                                                                                                                                         |
| Self-care                        | <p><i>"And then I think it's just trying to keep your own health kind of optimal so that you are physically healthy it makes the difference to being mentally healthy I think. If you are physically healthy it gives you a bit of robustness." (ACCP 2)</i></p> <p><i>"Yeah I do, I tend to go for long walks I take my dogs, go off with my dogs on lots of long walks and fresh air and open space and I don't mind admitting copious quantities of wine over that weekend. And yeah, that's probably how I, fresh air, exercise, wine." (Nurse 2)</i></p>                                                                                                                                                                                                                                                                                                                                                                                                                         |
| Informal talking with colleagues | <p><i>"I will talk to either another senior registrar so peer support, that can be very helpful or, you know, consultants that I get on with. So in those circumstances I am looking for someone who is, again it's not kind of, it's not an explicit thought process but I will want someone who I know is on a similar wavelength and will be understanding. Oh yes, someone who, yes someone who's opinion I value." (Doctor 4)</i></p> <p><i>"And it was really useful actually to see people that you are a little bit in awe of sort of like scary Band 7s, it was quite useful to see them sort of actually sort of coming down to our level, the ground level and being distressed by things they have seen... so it was good to see, I was so surprised to see this one particular Band 7 in floods of tears and I thought oh you are human, that's awful isn't it?" (Nurse 2)</i></p>                                                                                       |
| Supportive environment           | <p><i>"I think what you need is a culture where that's available as and when you need it. And so you know it's alright to sort of say, you know, to some of my bosses or some of my colleagues, actually something shit has just happened can we go and have a cup of tea and a chat... But for me I think that's probably a better approach, is to have the culture where that's okay and then you can go and find what you want from who you want." (Doctor 4)</i></p> <p><i>"I've worked in small hospitals and large hospitals as a nurse and I do think generally [support is better] in a smaller hospital... you've got a smaller team so you know each other better and when you've got a smaller team, smaller teams do tend to stay put more. Whereas bigger hospitals obviously you might not know the staff that you're on with and things like that. ...how are you going to have support from somebody that's an agency who's only there for the day." (ACCP 1)</i></p> |

|                                                 |                                                                                                                                                                                                                                                                                                                                                                                                                                                                                                                                                                                                                                                                                                                                                                                                                                                                                                                                                                                                                                       |
|-------------------------------------------------|---------------------------------------------------------------------------------------------------------------------------------------------------------------------------------------------------------------------------------------------------------------------------------------------------------------------------------------------------------------------------------------------------------------------------------------------------------------------------------------------------------------------------------------------------------------------------------------------------------------------------------------------------------------------------------------------------------------------------------------------------------------------------------------------------------------------------------------------------------------------------------------------------------------------------------------------------------------------------------------------------------------------------------------|
|                                                 | <p><i>"I think our larger critical care units are not a good idea... I think the bigger units are less personalised and it's hard to maintain and retain a proper team, so it's better to keep the units down to 15 or 20 beds and try and have core teams that don't rotate." (ACCP 2)</i></p>                                                                                                                                                                                                                                                                                                                                                                                                                                                                                                                                                                                                                                                                                                                                       |
| <p>Informal talking with friends and family</p> | <p><i>"I think because I live with my husband who has no knowledge whatsoever of what goes on in this kind of environment, I do talk about work when I get home, but I don't tend to sort of go into that kind of nitty gritty with him because, I don't know really, I just don't. I think he finds it a bit boring to be honest with you, it's not anything he particularly knows about." (Nurse 2)</i></p> <p><i>"[I] have peer support, good family support and my wife is an anaesthetist as well so I can talk through stuff with her easily and all the family and friends, I have got lots of friends who are various members of the medical profession." (ACCP 2)</i></p>                                                                                                                                                                                                                                                                                                                                                    |
| <p>Formal debrief</p>                           | <p><i>"I have experienced both those both (formal and informal discussions) and I think for the type of a major clinical incident then I think that a formal sort of debriefing top down sort of debriefing to show that you are supported by your sort of managers is probably better for something that is really awful. But working in critical care you are going to come across something that is pretty awful every day. So I think that we as a sort of cohort of nurses just tend to talk to each other informally most of the time." (Nurse 2)</i></p> <p><i>"Unfortunately, the physical logistics of doing things like the debriefs are virtually impossible, they are not easy, they are really not. You know what it's like you have a unit full of patients, you've got a million jobs to do, you've got five families to talk to and discuss it all with, trying to fit debriefs in around that as well, before you know it's 5:30 and your team have gone home or are hoping to get home on time." (Doctor 2)</i></p> |

**Supplementary Figure 1** Multivariable logistic regression model prediction of intention to leave current post due to moral distress.

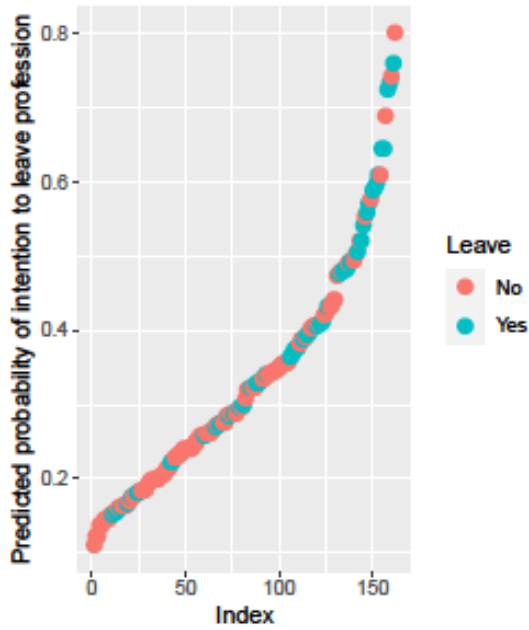

Peer review only

# BMJ Open

## Moral distress amongst intensive care unit professions in the UK: A mixed methods study

|                                 |                                                                                                                                                                                                                                                                                                                                                                                                                                             |
|---------------------------------|---------------------------------------------------------------------------------------------------------------------------------------------------------------------------------------------------------------------------------------------------------------------------------------------------------------------------------------------------------------------------------------------------------------------------------------------|
| Journal:                        | <i>BMJ Open</i>                                                                                                                                                                                                                                                                                                                                                                                                                             |
| Manuscript ID                   | bmjopen-2022-068918.R1                                                                                                                                                                                                                                                                                                                                                                                                                      |
| Article Type:                   | Original research                                                                                                                                                                                                                                                                                                                                                                                                                           |
| Date Submitted by the Author:   | 13-Jan-2023                                                                                                                                                                                                                                                                                                                                                                                                                                 |
| Complete List of Authors:       | Boulton, Adam; University of Warwick, Warwick Medical School; University Hospitals Coventry and Warwickshire NHS Trust<br>Slowther, Anne-Marie; University of Warwick, Warwick Medical School<br>Yeung, Joyce ; University of Warwick, Warwick Medical School; University Hospitals Birmingham NHS Foundation Trust<br>Bassford, C; University of Warwick, Warwick Medical School; University Hospitals Coventry and Warwickshire NHS Trust |
| <b>Primary Subject Heading</b>: | Intensive care                                                                                                                                                                                                                                                                                                                                                                                                                              |
| Secondary Subject Heading:      | Ethics                                                                                                                                                                                                                                                                                                                                                                                                                                      |
| Keywords:                       | INTENSIVE & CRITICAL CARE, Adult intensive & critical care <<br>INTENSIVE & CRITICAL CARE, Adult intensive & critical care <<br>INTENSIVE & CRITICAL CARE, ETHICS (see Medical Ethics)                                                                                                                                                                                                                                                      |
|                                 |                                                                                                                                                                                                                                                                                                                                                                                                                                             |

SCHOLARONE™  
Manuscripts





I, the Submitting Author has the right to grant and does grant on behalf of all authors of the Work (as defined in the below author licence), an exclusive licence and/or a non-exclusive licence for contributions from authors who are: i) UK Crown employees; ii) where BMJ has agreed a CC-BY licence shall apply, and/or iii) in accordance with the terms applicable for US Federal Government officers or employees acting as part of their official duties; on a worldwide, perpetual, irrevocable, royalty-free basis to BMJ Publishing Group Ltd ("BMJ") its licensees and where the relevant Journal is co-owned by BMJ to the co-owners of the Journal, to publish the Work in this journal and any other BMJ products and to exploit all rights, as set out in our [licence](#).

The Submitting Author accepts and understands that any supply made under these terms is made by BMJ to the Submitting Author unless you are acting as an employee on behalf of your employer or a postgraduate student of an affiliated institution which is paying any applicable article publishing charge ("APC") for Open Access articles. Where the Submitting Author wishes to make the Work available on an Open Access basis (and intends to pay the relevant APC), the terms of reuse of such Open Access shall be governed by a Creative Commons licence – details of these licences and which [Creative Commons](#) licence will apply to this Work are set out in our licence referred to above.

Other than as permitted in any relevant BMJ Author's Self Archiving Policies, I confirm this Work has not been accepted for publication elsewhere, is not being considered for publication elsewhere and does not duplicate material already published. I confirm all authors consent to publication of this Work and authorise the granting of this licence.

1  
2  
3 **Original research article**  
4  
5  
6  
7  
8  
9

10  
11 **Moral distress amongst intensive care unit professions in the UK: A**  
12 **mixed methods study**  
13  
14  
15

16  
17  
18  
19 Adam J Boulton<sup>1,2</sup>, Anne-Marie Slowther<sup>1</sup>, Joyce Yeung<sup>1,3</sup>, Christopher Bassford<sup>1,2</sup>  
20  
21

22  
23 <sup>1</sup>Warwick Medical School, University of Warwick, Coventry, UK  
24

25  
26 <sup>2</sup>University Hospitals Coventry and Warwickshire NHS Trust, Coventry, UK  
27

28  
29 <sup>3</sup>University Hospitals Birmingham NHS Foundation Trust, Birmingham, UK  
30  
31

32  
33 Correspondence to: Dr Adam J Boulton  
34

35  
36 Email: adam.boulton@nhs.net  
37  
38  
39

40 Submitting author: Dr Adam J Boulton, Critical Care Unit, University Hospitals Coventry and  
41 Warwickshire NHS Trust, Clifford Bridge Road, Coventry, CV2 2DX, UK  
42  
43  
44

45  
46 Keywords: Moral distress; intensive care; ethical climate; staff wellbeing; burnout  
47  
48  
49

50  
51 Short title:  
52

53 Moral distress in UK ICUs  
54  
55  
56  
57  
58  
59  
60

## Abstract

### Objective

To assess the experience of moral distress amongst intensive care unit (ICU) professionals in the UK.

### Design

Mixed methods: validated quantitative measure of moral distress followed by purposive sample of responders who underwent semi-structured interviews.

### Setting

Four ICUs of varying size and speciality facilities.

### Participants

Healthcare professionals working in ICU.

### Results

227 questionnaires were returned and 15 interviews performed. Moral distress occurred across all ICUs and professional demographics. It was most commonly related to providing care perceived as futile or against the patient's wishes/interests, followed by resource constraints compromising care. Moral distress score was independently influenced by profession ( $p=0.02$ ) (nurses 117.0 vs doctors 78.0). A lack of agency was central to moral distress and its negative experience could lead to withdrawal from engaging with patients/families. One-third indicated their intention to leave their current post due to moral distress and this was greater amongst nurses than doctors (37.0% vs 15.0%). Moral distress was independently associated with an intention to leave their current post ( $p<0.0001$ ) and a previous post ( $p=0.001$ ). Participants described a range of individualised coping strategies tailored to the situations faced. The most common and highly valued strategies were informal and relied on working within a supportive environment along with a close-knit team, although participants acknowledged there was a role for structured and formalised intervention.

### Conclusions

Moral distress is widespread amongst UK ICU professionals and can have an important negative impact on patient care, professional wellbeing, and staff retention, a particularly concerning finding as this study was performed prior to the COVID-19 pandemic. Moral distress due to resource-related issues is more severe than comparable studies in North America. Interventions to support professionals should recognise the individualistic nature of coping with moral distress. The value of

1  
2  
3 close-knit teams and supportive environments has implications for how intensive care services are  
4 organised.  
5  
6  
7  
8  
9

### 10 **Strengths and limitations of this study**

- 12 • This multi-centre study included UK ICUs of different size and sub-specialty capability.
- 13 • The mixed methods design increased the richness and scope of the data and enabled  
14 triangulation of findings.
- 15 • There is a risk of selection bias if health care professionals particularly affected by moral  
16 distress were more likely to participate.
- 17 • The study will not have captured the views and experiences of health professionals who have  
18 left the profession because of moral distress.
- 19 • The study represents a snapshot of moral distress which may be influenced by specific  
20 contextual issues.  
21  
22  
23  
24  
25  
26  
27  
28  
29  
30  
31  
32  
33  
34  
35  
36  
37  
38  
39  
40  
41  
42  
43  
44  
45  
46  
47  
48  
49  
50  
51  
52  
53  
54  
55  
56  
57  
58  
59  
60

## Introduction

The COVID-19 pandemic has highlighted the psychological challenges faced by intensive care professionals around the world, including moral distress.(1-4) A survey conducted by the British Medical Association found that 78.4% of doctors experienced moral distress during the pandemic.(5) The importance of staff wellbeing and combatting staff burnout was recognised prior to the pandemic and is a priority for healthcare services worldwide, including the NHS.(6-8) A key contributor to burnout is moral distress.(9-13) Moral distress is a constellation of emotional and psychological features that occur when a professional identifies an ethically correct course of action, but is prevented from following this course.(14-16) It can also occur in situations where there is uncertainty or conflict regarding the ethically correct action.(17-19) It can be deeply damaging to the individual and is associated with a tendency to leave the profession, with a consequent negative impact on patient care.(9, 20) Some authors have suggested the definition of moral distress is broadened to fully capture its experience and recognise that it may also occur in situations of moral uncertainty.(19)

The intensive care unit (ICU) is a place where patients with life-threatening conditions may be treated with a variety of invasive and burdensome interventions.(21) Highly significant, complex, and difficult decisions are made on a regular basis.(22). Treatment in the ICU comprises complex interventions that require a multifaceted approach and interaction of a broad multidisciplinary team, which may include pharmacists, physiotherapists, dieticians, and other allied health professionals. This environment is highly susceptible to moral distress and hence moral distress amongst ICU professions is of concern.(14, 18, 23, 24)

Moral distress was first identified in ICU nurses in North America and has been most frequently studied in this population.(14, 18, 23-25) Similar causes of moral distress have also been found amongst other ICU professionals, including physicians, respiratory therapists, and healthcare students.(20, 26-30) Despite concerns over ICU staff wellbeing, burnout and moral distress in the NHS, moral distress remains poorly studied in the UK.(19, 31, 32) Moral distress may be affected by specific contextual factors such as availability of resources and model of decision making for patients lacking capacity. In the UK the availability of intensive care provision is much less than in North America and the role of proxy decision makers is much more significant.(33-35) These, and other potential differences may affect how moral distress is experienced by UK health professionals.

This study was performed prior to the COVID-19 pandemic and its primary aim was to assess the experience of moral distress amongst ICU professionals in the UK. Secondary aims were to a) identify the most common causes of moral distress; b) determine the relationship between demographic and professional characteristics and moral distress; c) examine the relationship between moral distress

1  
2  
3 and intention to leave the profession, and d) identify potential interventions to mitigate moral  
4 distress.  
5  
6  
7  
8  
9  
10

## 11 **Methods**

12 The NHS Health Research Authority provided approvals for the study (IRAS:238379) and the research  
13 and development (R&D) department at University Hospitals Coventry and Warwickshire NHS Trust  
14 acted as study sponsor. The study was approved locally by each site's R&D department.  
15  
16  
17  
18

19 Participants were recruited from four adult ICUs. Sites A & B are large tertiary care hospitals with  
20 major trauma and complex multi-specialty surgical facilities and sites C & D are smaller district general  
21 hospitals with fewer specialist services. Sites C and D are part of the same organisational Trust so some  
22 staff work across both sites. Bed capacities of sites range from 12 to 80 beds. All full- and part-time  
23 healthcare professionals (HCP) working in the ICU were eligible. All grades and clinical professions  
24 were included, but students of any profession were excluded.  
25  
26  
27  
28  
29

30 An anonymous paper questionnaire using the validated Measure of Moral Distress for Healthcare  
31 Professionals (MMD-HP (Supplementary File 1)) was distributed between February 2019 and February  
32 2020.(36) The MMD-HP is a 27-item questionnaire that utilises a 0-4 point Likert scale to assess the  
33 frequency with which situations arise and the intensity of the moral distress caused.(25, 36) These are  
34 summed to produce overall frequency and intensity scores. Individual item frequency and intensity  
35 scores are multiplied together to produce a composite item score and these summed to generate an  
36 overall moral distress score. A free text section allows participants to describe additional scenarios  
37 not included in the MMD-HP inventory. The MMD-HP also includes two related questions concerning  
38 intention to leave the profession now or in the past due to moral distress.(36) Participant  
39 demographics were collected including profession, grade, age, gender, and years of ICU working  
40 experience.  
41  
42  
43  
44  
45  
46  
47  
48  
49

50 Descriptive statistics were used to summarise demographics and moral distress scores. Individual item  
51 scores were ranked for comparison. Moral distress scores were non-normally distributed, as found in  
52 previous studies,(20, 31) and hence are presented as medians with IQRs and non-parametric statistical  
53 tests were used (Wilcoxon signed rank, Kruskal-Wallis). A sample size requirement calculation was not  
54 performed as there was inadequate UK data using the MMD-HP. Multiple linear regression was used  
55 to investigate the relationship between age and ICU experience and moral distress scores. Multiple  
56 logistic regression models were fitted to determine the association between moral distress scores and  
57  
58  
59  
60

1  
2  
3 tendency to leave the profession. Covariates were pre-specified demographic and professional  
4 variables, with binary classification used for profession (nurse vs other) and hospital type (tertiary care  
5 vs district general). Discrimination of logistic regression models was assessed using area under the  
6 receiver operator curve (ROC AUC). For tendency to leave a previous position, an ordinal logistic  
7 regression was used in accordance with the ordinal dependent variable. Statistical analyses were  
8 performed using R version 3.6.1 (R Foundation for Statistical Computing) with the code for analyses  
9 available on request.  
10  
11  
12  
13  
14

15  
16 Questionnaire respondents willing to take part in an interview included their contact details on the  
17 returned questionnaire and from those responders, potential interview participants were purposively  
18 sampled for hospital, profession, grade, and overall moral distress score using a maximum variation  
19 approach. Written informed consent was obtained prior to interview. Semi-structured interviews with  
20 an interview guide (Supplementary File 2) were conducted face to face between July 2019 and  
21 February 2020 and explored participants experience of moral distress, the situations that cause it,  
22 strategies they use to cope with it; and their views on possible interventions to alleviate moral distress.  
23 Interviews lasted approximately 30 mins and were audio-recorded then transcribed verbatim.  
24 Interviews were conducted until no new themes emerged from the data. The Framework Method of  
25 thematic analysis was used.<sup>(37)</sup> Transcripts were loaded onto NVivo and data initially organised into  
26 content areas informed by the study aims: experience of moral distress and coping with moral distress.  
27 Within each area two main categories were explored: precipitating factors/causes of moral distress  
28 and the response to distress; coping strategies and interventions to support coping. This is described  
29 in Supplementary Figure 1. Data within each content area was then re-read and coded inductively,  
30 and codes compared and grouped to develop themes and sub-themes. All transcripts were coded by  
31 AB with 30% independently coded by AMS. The codes and emerging themes and sub-themes were  
32 discussed at regular analysis meetings to improve the analysis validity and trustworthiness.  
33  
34  
35  
36  
37  
38  
39  
40  
41  
42  
43  
44

### 45 **Patient and Public Involvement**

46  
47 The study received contributions from the patient and public representatives from the University  
48 Hospitals Birmingham Clinical Research Ambassador Group. The members supported the proposed  
49 study and the saw potential for the work to benefit staff wellbeing and patient care. The group  
50 contributed to the study design, development of study documentation, including the protocol and  
51 participant information sheet, and the dissemination plan.  
52  
53  
54  
55  
56  
57  
58  
59  
60

## Results

Two hundred and twenty-seven questionnaires were returned from a total of 772 questionnaires distributed across all sites, giving an overall response rate of 29.4% (site A 28.3%, site B 24.0%, sites C & D 34.6%). Participant demographics are described in Table 1. Forty-one of the 227 participants completing the paper questionnaire indicated a willingness to take part in an interview, twenty-one were contacted with an invitation and further information about the interview study and 15 agreed to be interviewed. Interview participant demographics are summarised in Supplementary Table 1.

The quantitative results from the MMD-HP are presented first, followed by the qualitative results grouped into experience of moral distress and coping with moral distress.



**Table 1** Participant demographics

| Characteristic                             | N=227           |
|--------------------------------------------|-----------------|
| Mean age $\pm$ SD – years                  | 38.1 $\pm$ 10.3 |
| Gender – no. (%)                           |                 |
| <i>Female</i>                              | 165 (72.7%)     |
| <i>Male</i>                                | 52 (23.0%)      |
| <i>Not answered</i>                        | 10 (4.4%)       |
| Profession – no. (%)                       |                 |
| <i>Nurse</i>                               | 145 (63.9%)     |
| <i>Doctor</i>                              | 40 (17.6%)      |
| <i>Physiotherapist</i>                     | 9 (4.0%)        |
| <i>Advanced Critical Care Practitioner</i> | 8 (3.5%)        |
| <i>Pharmacist</i>                          | 2 (0.9%)        |
| <i>Not answered</i>                        | 23 (10.1%)      |
| Mean ICU experience $\pm$ SD – years       | 10.1 $\pm$ 9.2  |

### Moral distress items

Fourteen questionnaires were excluded due to missing responses preventing calculation of the moral distress score. Items are ranked by composite score for nurses and doctors in Supplementary Table 2. The most highly scored items by both nurses and doctors related to delivering aggressive treatment that was perceived as futile or not in the patient's best interests. Other highly ranked items related to lack of resources, caring for more patients than is considered safe, excessive documentation, lack of administrative support, and abusive patients/family members compromising care. Nurses generally rated moral distress frequency and intensity more highly than doctors. Only four of the 27 items had a greater composite score for doctors over nurses and there was no commonality in the root causes of these scenarios.

### Moral distress score associations

Total composite moral distress scores were positively skewed with a median score of 108 (IQR 78.2, range 0 to 288). The relationship between overall moral distress score and demographic characteristics are summarised in Figure 1. Moral distress was greater in females than males (111.5 (IQR 75.5) vs 94.0 (IQR 69.3),  $W=4755.5$ ,  $p=0.043$ ) and was significantly influenced by profession ( $H=11.89$ ,  $p=0.018$ ) with nurses reporting greater moral distress than doctors (117.0 (IQR 65.5) vs 78.0 (IQR 73.0)). There were differences in the distribution of gender across professions (Nurse: 83.7% female; Doctor: 40.0% female). Differences in moral distress between nurses and doctors persisted after statistical adjustment for differences in gender across professions ( $p=0.020$ ). There was no relationship between overall moral distress score and participant age and ICU experience. This was confirmed with multiple linear regression where an interaction effects model of age and ICU experience against overall moral distress could only explain less than 1% of the variation in moral distress (adjusted  $R^2$  0.0089). Median moral distress scores were higher in larger tertiary care hospitals than district general hospitals, however this did not reach statistical significance (114.5 (IQR 91.8) vs 98.0 (IQR 69.9),  $W=5012.5$   $p=0.23$ ).

### Intention to leave the profession

Seventy-one (33.3%) participants indicated their intention to leave their current post due to moral distress. Twenty-eight (13.1%) participants reported they had left a previous post due to moral distress and 101 (47.4%) reported they had considered leaving a previous post due to moral distress but did not leave. Overall moral distress was significantly greater in those intending to leave their current post (135.5 (IQR 84.5) vs 88.9 (IQR 65.3),  $W=2771.5$   $p<0.0001$ ) and this difference was confirmed in both univariate and multiple logistic regression analyses. Logistic regression model variable ORs are summarised in Table 2. Multiple logistic regression included profession, gender, hospital type, age and

1  
2  
3 ICU experience as covariates and had good discrimination (ROC AUC 0.722) and ability to predict  
4 intention to leave (Supplementary Figure 2). Adjusted odds ratio for moral distress score against  
5 intention to leave was 1.011 (95% CI 1.005-1.017,  $p<0.001$ ).  
6  
7

8  
9 A greater proportion of nurses were considering leaving their current post due to moral distress than  
10 doctors (37.0% vs 15.0%). Nurses had a significantly greater odds of reporting an intention to leave  
11 the profession in both unadjusted (OR 3.013, 95% CI 1.442-6.810,  $p<0.01$ ) and adjusted analyses  
12 (adjOR 3.023, 95% CI 1.243-8.014,  $p=0.019$ ). There was no significant association between gender and  
13 intention to leave the profession in either unadjusted or adjusted models.  
14  
15  
16

17  
18 Moral distress score was significantly associated with the ordinal outcome of leaving a previous post  
19 in unadjusted and adjusted analyses (OR 1.010, 95% CI 1.006-1.015,  $p<0.0001$ ; adjOR 1.009, 95% CI  
20 1.004-1.014,  $p=0.001$ ). Female gender and nurse profession were not significantly associated with  
21 leaving a previous post in adjusted analyses. Ordinal logistic regression model variable ORs are  
22 summarised in Supplementary Table 3.  
23  
24  
25  
26  
27  
28  
29  
30  
31  
32  
33  
34  
35  
36  
37  
38  
39  
40  
41  
42  
43  
44  
45  
46  
47  
48  
49  
50  
51  
52  
53  
54  
55  
56  
57  
58  
59  
60

**Table 2** Logistic regression model variables and association with intention to leave current post in univariable and multiple analyses. Italics and \* indicate statistically significant association. (OR=Odds Ratio, CI=Confidence Interval)

| Variable                        | Univariable OR<br>(95% CI) | p-value    | Multivariable OR<br>(95% CI) | p-value   |
|---------------------------------|----------------------------|------------|------------------------------|-----------|
| Age (per year)                  | 0.995 (0.966 – 1.024)      | 0.739      | 0.982 (0.929 – 1.036)        | 0.516     |
| ICU experience (per year)       | 1.005 (0.973 – 1.038)      | 0.762      | 1.009 (0.929 – 1.072)        | 0.781     |
| Gender                          |                            |            |                              |           |
| <i>Male</i>                     | Ref                        | Ref        | Ref                          | Ref       |
| <i>Female</i>                   | 1.289 (0.645 – 2.679)      | 0.482      | 0.668 (0.271 – 1.630)        | 0.375     |
| Profession                      |                            |            |                              |           |
| <i>Other</i>                    | Ref                        | Ref        | Ref                          | Ref       |
| <i>Nurse</i>                    | 3.013 (1.442 – 6.810)      | 0.00496*   | 3.023 (1.243 – 8.014)        | 0.0188*   |
| Hospital type                   |                            |            |                              |           |
| <i>District general</i>         | Ref                        | Ref        | Ref                          | Ref       |
| <i>Tertiary care</i>            | 1.17 (0.648 – 2.132)       | 0.605      | 0.953 (0.466 – 1.948)        | 0.895     |
| Moral distress total (per unit) | 1.011 (1.006 – 1.017)      | 0.0000327* | 1.011 (1.005 – 1.018)        | 0.000883* |

1  
2  
3 The qualitative results from interviews are reported below and are reported by content area:  
4 experience of moral distress and coping with moral distress  
5  
6

### 7 **Experience of moral distress**

8  
9 During analysis two areas of experience were considered; precipitating factors/causes of moral  
10 distress and the response to distress. Three distinct themes emerged in relation to causes of moral  
11 distress. The dominant theme was of moral distress due to a perception that care provided was not in  
12 the patient's best interests. Participants talked about a feeling of helplessness in the face of seemingly  
13 endless and potentially futile, delivering care that disregarded patient wishes, and external pressure  
14 to provide care that is seen as not in the patient's interests. The two other themes in this area were  
15 resource constraints compromising care; and inability to protect more junior staff. Responses to moral  
16 distress were categorised in the following themes: negative emotional response; avoidance of patient  
17 and family; impact on future career decisions; moral distress changing over time. Experiencing moral  
18 distress led to a range of negative emotions and behaviours. Frustration and anger were the most  
19 frequently described emotions. Experiencing moral distress could also lead to avoidance of interaction  
20 with patients and their family. Some participants described this behaviour as "self-protection".  
21 Experiencing and coping with moral distress had led some participants to question their future in  
22 intensive care. Junior doctors considering careers in intensive care had changed course after  
23 experiencing and struggling to cope with moral distress themselves or observing the impact on more  
24 senior colleagues, contemplating whether this was something they wanted for themselves. Some  
25 participants suggested moral distress got better with increasing ICU experience as they were better  
26 able to rationalise situations, manage emotions, and/or had improved coping strategies and resilience.  
27 Conversely, others felt that moral distress got worse over time, either because they were more aware  
28 of situations where patient care could be better, or because their increasing age made cases more  
29 personally relatable. Illustrative quotes for these themes within experience of moral distress are  
30 reported in Table 3.  
31  
32  
33  
34  
35  
36  
37  
38  
39  
40  
41  
42  
43  
44  
45  
46  
47  
48  
49  
50  
51  
52  
53  
54  
55  
56  
57  
58  
59  
60

**Table 3** Illustrative quotes from participant experience of moral distress

| Content area                                    | Theme                                                                                                                                                                                                                                                                                                                                                                                                                                                                                                                                                                                                                                                                                                | Quotation example                                                                                                                                                                                                                                                                                                                                                                                                                                                                                                                                                                                                                                                                                                                                                                                                                                                                                                                                                                                                                                                                         |
|-------------------------------------------------|------------------------------------------------------------------------------------------------------------------------------------------------------------------------------------------------------------------------------------------------------------------------------------------------------------------------------------------------------------------------------------------------------------------------------------------------------------------------------------------------------------------------------------------------------------------------------------------------------------------------------------------------------------------------------------------------------|-------------------------------------------------------------------------------------------------------------------------------------------------------------------------------------------------------------------------------------------------------------------------------------------------------------------------------------------------------------------------------------------------------------------------------------------------------------------------------------------------------------------------------------------------------------------------------------------------------------------------------------------------------------------------------------------------------------------------------------------------------------------------------------------------------------------------------------------------------------------------------------------------------------------------------------------------------------------------------------------------------------------------------------------------------------------------------------------|
| Precipitating factors/ causes of moral distress | Endless care                                                                                                                                                                                                                                                                                                                                                                                                                                                                                                                                                                                                                                                                                         | <p><i>"And that kind of torture of not knowing, it's not like there is something difficult to be done and we know what it is, the fact that it just drags and drags and drags on like this with no kind of end in sight, you know, like motorway traffic and you don't know, you know if it's just off the next junction and then you think I can bear it but if this is going to be all the way to Manchester, it's that sort of, it's difficult."</i> (Doctor 5)</p> <p><i>"But the families have lost completely that narrative that this is a child that is going to die or an adult that is going to die soon. Exactly the same way with cancer patients, you know, ultimately someone has got to tell them that their cancer is incurable. That message is lost from these adults and so then the problem is you are starting from a point where these families and individuals have had massive amounts of aggressive interventional care,... And they have lost the narrative that this is a child ultimately with a life limiting illness."</i> (Doctor 4)</p>                   |
|                                                 | Disregard for patient wishes                                                                                                                                                                                                                                                                                                                                                                                                                                                                                                                                                                                                                                                                         | <p><i>"...he (the registrar) went to a patient on the ward and had a long chat with the patient ...and she basically said, I am done, I want to go home. And I was like okay right, this is a very senior doctor so that's what she said, that's her wishes, and then the next thing I know like she's coming to ITU, getting lined and up and then she died in ITU like five days later or something."</i> (Doctor 3)</p> <p><i>"It was very distressing actually, really distressing because his motives (the consultant) were not about care and comfort for the patient."</i> (Nurse 6)</p>                                                                                                                                                                                                                                                                                                                                                                                                                                                                                           |
|                                                 | External pressures to encourage delivery of perceived futile care                                                                                                                                                                                                                                                                                                                                                                                                                                                                                                                                                                                                                                    | <p><i>"I just thought the bit that I didn't understand was like multiple consultants were saying they didn't think she was going to get well and that seemed to be like the collective ITU opinion but we still admitted her because it was what oncology wanted."</i> (Doctor 3)</p> <p><i>"...her family throughout have been, what's the word? I want to say unreasonable but, they have been, they have resisted all honest conversation to the point now that the conversations that we have with them are not honest because they insist that they are not. Just really falsely optimistic despite all the preamble conversations ... I feel like somebody should be able to stop it but I don't know who that might be... So then the kind of whole relationship has deteriorated to nothing between the family and the medical team."</i> (Doctor 5)</p>                                                                                                                                                                                                                          |
|                                                 | Resource constraints compromising care                                                                                                                                                                                                                                                                                                                                                                                                                                                                                                                                                                                                                                                               | <p><i>"And we only had the capacity to see one of them. And the one that we saw was the sick person but then didn't survive until the following day and the one we didn't see ended up being ventilated for quite some time really, and it felt like we didn't direct our resources to the right place there."</i> (Nurse 5)</p> <p><i>"So for example we had a lady who had a devastating intracranial haemorrhage, she was coming into the unit for neuro prognostication probably the organ donation process. We were stuck with her for hours and it was all the kind of chaos as it is in resus, [with] a grieving family... stuck by this bedside in resus which was like a zoo, there was building work going on, the whole thing was so undignified... They couldn't get the bed [in ICU] because they couldn't get the patients out, you know, everybody is stuck, stuck, stuck and at the end of it I was stuck with this patient in this awful environment with her grieving family, just thinking I can't, this is just unbearable. It was just horrible."</i> (Doctor 5)</p> |
|                                                 | Seniors unable to protect staff                                                                                                                                                                                                                                                                                                                                                                                                                                                                                                                                                                                                                                                                      | <p><i>"I would say the things that preoccupy me are not necessarily clinical things, they are more about my team and if I am concerned about the wellbeing of my team I will often worry about, you know, I don't know what to do about this situation, I don't know how to improve things ... There isn't anything I can physically do, I can't magic people to come and help, and the staff appreciate that but it's still kind of, you worry for the people that are there continuing to work and their wellbeing and their stress levels."</i> (Nurse 5)</p>                                                                                                                                                                                                                                                                                                                                                                                                                                                                                                                          |
| Response to moral distress                      | <p><i>"I do find it stressful, I do get quite angry, not in the moment but often, you know, I feel very grumpy or angry walking back to the ITU having done it all. There is just a great frustration."</i> (Doctor 4)</p> <p><i>"And I feel like almost angry at the family for, and then that doesn't feel right, that feels like a really unwelcome feeling to feel angry at this poor family who have had a terrible thing happen to them and just love their loved one and I kind of see that. But it just goes on and on and on and it feels like torture for her, for everybody that looks after her, and it feels like something criminal, you know, it feels worse than"</i> (Doctor 5)</p> |                                                                                                                                                                                                                                                                                                                                                                                                                                                                                                                                                                                                                                                                                                                                                                                                                                                                                                                                                                                                                                                                                           |

|                                              |                            |                                                                                                                                                                                                                                                                                                                                                                                                                                                                                                                                                                                                                                                                                                                                                                                                               |
|----------------------------------------------|----------------------------|---------------------------------------------------------------------------------------------------------------------------------------------------------------------------------------------------------------------------------------------------------------------------------------------------------------------------------------------------------------------------------------------------------------------------------------------------------------------------------------------------------------------------------------------------------------------------------------------------------------------------------------------------------------------------------------------------------------------------------------------------------------------------------------------------------------|
| 1<br>2<br>3<br>4<br>5<br>6<br>7              | Upset                      | <p><i>"So at the time I feel like there are tears like behind my eyes and I will feel that kind of like ache in your throat that you get and I feel nauseated and I just feel like just exhausted by it really, you know, you keep trying to apologise to the family, trying to look after the patient as best you can. You know, try and apologise, you know, just kind of try to soften, you try to be the buffer between the situation and the patient and the family but you suffer for that don't you?" (Doctor 5)</i></p> <p><i>"Yeah definitely, we all sat in one of the side rooms together and everyone had the opportunity to express their feelings, most of us had a good cry, you know, that sort of thing." (Nurse 2)</i></p>                                                                  |
| 8<br>9<br>10                                 | Deflation, Dissatisfaction | <i>"So when I was driving home I felt a bit deflated like I hadn't really done, like I hadn't really done the very best that I could have done although it was quite a messy, it was a bit of a messy situation. And of course lots of clinical situations are very messy, especially when there is more than one team involved and that sort of thing. So I just had a vague sense of feeling dissatisfaction and I should have really known that information before." (Nurse 2)</i>                                                                                                                                                                                                                                                                                                                         |
| 11<br>12                                     | Worry                      | <i>"I would then go home and pick apart my decisions and ruminate and kind of sabotage myself. And then I can't sleep and then I go to work the next day knackered and I worry that my decision making is worse then and then you spiral don't you I think." (Doctor 5)</i>                                                                                                                                                                                                                                                                                                                                                                                                                                                                                                                                   |
| 13<br>14                                     | Relatable case             | <i>"You know, you wouldn't want if for yourself or your own family and yet it keeps going on, you know, it's kind of difficult to witness really. And you feel a bit like a perpetrator of it I think." (Doctor 5)</i>                                                                                                                                                                                                                                                                                                                                                                                                                                                                                                                                                                                        |
| 15<br>16<br>17<br>18<br>19<br>20             | Avoidance of interaction   | <p><i>"...my sympathy for the family has deteriorated over time... They come in and I don't like to look at them, so I don't look at them. And that feels inhuman and I think what's become of me, where is my humanity? But it's not that I don't care it's just the situation has got beyond me, that I just think I don't know how to respond to this anymore so I just don't look... that's terrible isn't it? So it is hard, it's really hard." (Doctor 5)</i></p> <p><i>"Yeah, even in handover she is kind of not mentioned really... yeah definitely emotionally like for self-protection I have kind of switched off a bit." (Doctor 5)</i></p>                                                                                                                                                      |
| 21<br>22<br>23<br>24<br>25<br>26<br>27<br>28 | Impact on career decisions | <p><i>"So the NHS for that I think that the amount of trauma that, or emotional trauma that we see that we absorb, that we take on, we don't get the right amount of, in our particular role it has a shelf life of two to four years." (Nurse 3)</i></p> <p><i>"I have previously actually thought about dual specialising in anaesthesia and intensive care. But my most recent job in intensive care has most definitely made me decide not to. But one of the reasons being in my experience has just been, I don't think it's one I would be able to continue and a career that I would be able to continue and still actually remain vaguely sane... That's why a lot of us don't really want to go into it, because it's soul destroying." (Doctor 2)</i></p>                                          |
| 29<br>30<br>31<br>32<br>33<br>34<br>35       | Changes over time          | <p><i>"The more experience you have definitely the easier it is but I have been really conscious of the burden that the job has on me and kind of being careful and protecting myself. Because if you want longevity you have to understand what it is doing to yourself and have ways of dealing with that." (ACCP 2)</i></p> <p><i>"I don't know whether this is just me, but personally I feel like I am less able to cope with it now, I get far more emotional now and upset by things than I did when I first started working in critical care... I think probably because of my age, I relate to a lot of the patients now that are either in a similar age range to myself or younger patients that we have that are in a similar age bracket to my children, it really resonates." (Nurse 5)</i></p> |

### Coping with moral distress

Two areas were considered; coping strategies for moral distress and interventions to support coping with moral distress. Participants described a range of strategies for coping with moral distress, tailoring their strategy to the particular situation. Strategies could be classified as internally or externally focussed. Internally focussed strategies included personal reflection, mental compartmentalisation, and self-care techniques. Personal reflection was commonly reported as a way of making sense of the distress experienced, however mandatory reflections were less helpful than when it occurred in an organic way. Externally focussed strategies include informal discussions with colleagues, talking to their friends/family, and more formal debrief sessions. The most frequently described and highly valued coping strategy involved talking with colleagues informally, such as chatting in the coffee room. The culture of the team appeared critical to allow informal talking to be effective. Participants valued a supportive environment with a close-knit, honest, and actively caring team. Smaller teams where staff knew each other well were reported as more supportive compared with larger teams where there was more movement of staff. Acknowledgment from a senior team member that a case was particularly distressing was powerful and reassuring. Conversely, seniors not wanting to engage in conversations was reported as detrimental to coping with moral distress.

Participants were asked about interventions to support coping with moral distress. Generally, participants felt that a personalised approach tailored to the particular situation was needed. Formal approaches were seen as more valuable for junior staff who perhaps did not have the same developed coping strategies. In general however, participants felt that informal support would be more authentic, accessible, faster acting, and efficacious. Facilitated discussion was suggested as a way of enhancing the effectiveness of informal talking with colleagues. Multiple participants proposed identifying a nominated group of senior and/or experienced ICU staff who could provide support and advice on an *ad hoc* basis with allocated time to deliver this role. Participants highlighted the importance of organisations valuing the wider working environment in supporting staff to cope with distress. Ensuring avoidable stresses were removed or reduced would enable staff to have more emotional and cognitive capacity to deal with the moral challenges that they faced in their work. For example, adequate car parking, and responsive services such as IT, payroll and HR, were all cited as areas that would improve overall staff wellbeing.

Illustrative quotes for these themes from coping with moral distress are reported in Table 4.



**Table 4** Illustrative quotes from participant coping with moral distress

| Content area      | Theme                                    | Quotation example                                                                                                                                                                                                                                                                                                                                                                                                                                                                                                                                                                                                                                                                                                                                                                                                                                                                                                                                                                                                                                                                                                                                                                                                                                                                     |
|-------------------|------------------------------------------|---------------------------------------------------------------------------------------------------------------------------------------------------------------------------------------------------------------------------------------------------------------------------------------------------------------------------------------------------------------------------------------------------------------------------------------------------------------------------------------------------------------------------------------------------------------------------------------------------------------------------------------------------------------------------------------------------------------------------------------------------------------------------------------------------------------------------------------------------------------------------------------------------------------------------------------------------------------------------------------------------------------------------------------------------------------------------------------------------------------------------------------------------------------------------------------------------------------------------------------------------------------------------------------|
| Coping strategies | Personal reflection                      | <p><i>"I think I just reflect constantly anyway, I don't know if everyone does, I imagine most of us do... I generally just do it in my head when I'm exercising I'll tend to think about, that went well, or that didn't go quite so well, what can I do to improve that next time. No, it's not something I think, right I need to go and meditate because that's upset me or whatever."</i> (Other 2)</p> <p><i>"Yeah I think the moment you make anything mandatory I think you lose quite a lot of the value... So I think it has to be voluntary, I think it has to be something people do because they recognise it for its own value."</i> (Doctor 3)</p>                                                                                                                                                                                                                                                                                                                                                                                                                                                                                                                                                                                                                     |
|                   | Mental compartmentalisation              | <p><i>"So I tend to compartmentalise work and home, because I have had periods of time before where I have been really, really distressed and it just, it's no good for your home life, so I've kind of, I box things off. I don't know if that is the right way of doing it or not but that's what I tend to do."</i> (Nurse 2)</p> <p><i>"I drive quite a long distance to work and back, so mine sort of goes in the car. I have a little refection and sometimes a little blurt in the car and then by time I've walked through the house, picked the dogs up and walk out, it's gone."</i> (ACCP 1)</p>                                                                                                                                                                                                                                                                                                                                                                                                                                                                                                                                                                                                                                                                          |
|                   | Self-care                                | <p><i>"And then I think it's just trying to keep your own health kind of optimal so that you are physically healthy it makes the difference to being mentally healthy I think. If you are physically healthy it gives you a bit of robustness."</i> (ACCP 2)</p> <p><i>"Yeah I do, I tend to go for long walks I take my dogs, go off with my dogs on lots of long walks and fresh air and open space and I don't mind admitting copious quantities of wine over that weekend. And yeah, that's probably how I, fresh air, exercise, wine."</i> (Nurse 2)</p>                                                                                                                                                                                                                                                                                                                                                                                                                                                                                                                                                                                                                                                                                                                         |
|                   | Informal talking with colleagues         | <p><i>"I will talk to either another senior registrar so peer support, that can be very helpful or, you know, consultants that I get on with. So in those circumstances I am looking for someone who is, again it's not kind of, it's not an explicit thought process but I will want someone who I know is on a similar wavelength and will be understanding. Oh yes, someone who, yes someone who's opinion I value."</i> (Doctor 4)</p> <p><i>"And it was really useful actually to see people that you are a little bit in awe of sort of like scary Band 7s, it was quite useful to see them sort of actually sort of coming down to our level, the ground level and being distressed by things they have seen... so it was good to see, I was so surprised to see this one particular Band 7 in floods of tears and I thought oh you are human, that's awful isn't it?"</i> (Nurse 2)</p>                                                                                                                                                                                                                                                                                                                                                                                       |
|                   | Supportive environment                   | <p><i>"I think what you need is a culture where that's available as and when you need it. And so you know it's alright to sort of say, you know, to some of my bosses or some of my colleagues, actually something shit has just happened can we go and have a cup of tea and a chat... But for me I think that's probably a better approach, is to have the culture where that's okay and then you can go and find what you want from who you want."</i> (Doctor 4)</p> <p><i>"I've worked in small hospitals and large hospitals as a nurse and I do think generally [support is better] in a smaller hospital... you've got a smaller team so you know each other better and when you've got a smaller team, smaller teams do tend to stay put more. Whereas bigger hospitals obviously you might not know the staff that you're on with and things like that. ...how are you going to have support from somebody that's an agency who's only there for the day."</i> (ACCP 1)</p> <p><i>"I think our larger critical care units are not a good idea... I think the bigger units are less personalised and it's hard to maintain and retain a proper team, so it's better to keep the units down to 15 or 20 beds and try and have core teams that don't rotate."</i> (ACCP 2)</p> |
|                   | Informal talking with friends and family | <p><i>"I think because I live with my husband who has no knowledge whatsoever of what goes on in this kind of environment, I do talk about work when I get home, but I don't tend to sort of go into that kind of nitty gritty with him because, I don't know really, I just don't. I think he finds it a bit boring to be honest with you, it's not anything he particularly knows about."</i> (Nurse 2)</p>                                                                                                                                                                                                                                                                                                                                                                                                                                                                                                                                                                                                                                                                                                                                                                                                                                                                         |

|                                 |                                 |                                                                                                                                                                                                                                                                                                                                                                                                                                                                                                                                                                                                                                                                                                                                                                                                                                                                                                                                                                                                                                       |
|---------------------------------|---------------------------------|---------------------------------------------------------------------------------------------------------------------------------------------------------------------------------------------------------------------------------------------------------------------------------------------------------------------------------------------------------------------------------------------------------------------------------------------------------------------------------------------------------------------------------------------------------------------------------------------------------------------------------------------------------------------------------------------------------------------------------------------------------------------------------------------------------------------------------------------------------------------------------------------------------------------------------------------------------------------------------------------------------------------------------------|
|                                 |                                 | <p><i>"[I] have peer support, good family support and my wife is an anaesthetist as well so I can talk through stuff with her easily and all the family and friends, I have got lots of friends who are various members of the medical profession." (ACCP 2)</i></p>                                                                                                                                                                                                                                                                                                                                                                                                                                                                                                                                                                                                                                                                                                                                                                  |
|                                 | Formal debrief                  | <p><i>"I have experienced both those both (formal and informal discussions) and I think for the type of a major clinical incident then I think that a formal sort of debriefing top down sort of debriefing to show that you are supported by your sort of managers is probably better for something that is really awful. But working in critical care you are going to come across something that is pretty awful every day. So I think that we as a sort of cohort of nurses just tend to talk to each other informally most of the time." (Nurse 2)</i></p> <p><i>"Unfortunately, the physical logistics of doing things like the debriefs are virtually impossible, they are not easy, they are really not. You know what it's like you have a unit full of patients, you've got a million jobs to do, you've got five families to talk to and discuss it all with, trying to fit debriefs in around that as well, before you know it's 5:30 and your team have gone home or are hoping to get home on time." (Doctor 2)</i></p> |
| Interventions to support coping | Formal and structured support   | <p><i>"But getting somebody in to discuss things or an away day or a coffee morning and things, sometimes you don't get the right people going to that do you?... What about the group of staff that don't go on the away day, that drops morale because they didn't go on it. And also they're working with locums and agency, so they're actually having a bad day then. So you can get animosity even just doing something like that." (ACCP 1)</i></p> <p><i>"Well ideally a psychotherapist or somebody who has that professional backing or professional background to be able to support that because otherwise talking can only go so far." (Nurse 3)</i></p>                                                                                                                                                                                                                                                                                                                                                                 |
|                                 | Group-based approach            | <p><i>"You're potentially opening yourself up to a whole room of strangers is a bit like alcoholics anonymous, some people wouldn't be up for that." (Other 1)</i></p> <p><i>"...or, you know. I think you don't want to criticise where you work and knowing that it can come back to you and there is that feeling the more junior you are the easier it is for you to go isn't it, I think there is still that." (Nurse 6)</i></p>                                                                                                                                                                                                                                                                                                                                                                                                                                                                                                                                                                                                 |
|                                 | Non-healthcare background       | <p><i>"Yes, so she came in, to kind of give us techniques but she just didn't really relate to healthcare it was more outside. So it just didn't relate to any of us... They can't relate it to us or how it would actually be working in a hospital." (Nurse 1)</i></p> <p><i>"I think it would be good to talk to people who know the environment because you don't have to explain all of that do you, you can just go in at a level of like mutual understanding and then you can just talk about the problem." (Doctor 5)</i></p>                                                                                                                                                                                                                                                                                                                                                                                                                                                                                                |
|                                 | Informal approach               | <p><i>"What I would say is that where, I don't know, I have always found that the organic process has always been the most helpful. I don't know whether that's because in a sense you kind of have more control over who you go and chat to or whether it just has more authenticity." (Doctor 4)</i></p>                                                                                                                                                                                                                                                                                                                                                                                                                                                                                                                                                                                                                                                                                                                            |
|                                 | Nominated ICU staff for support | <p><i>"I do wonder whether a facilitated system would be useful because I think the danger can be that if you've got people who are distressed talking to each other about the distress they can actually spiral down further... Rather than lift themselves out so a moderated sort of peer review or peer forum I guess would be helpful." (Doctor 1)</i></p> <p><i>"... have an identified person, say go to Adam, if you have got a problem go to Adam or its Adam's month to deal with all the grief or whatever. To say there is a role and you get a small bit of time for the role, the role exists in this place, it's paid for, it's budgeted and that's when it happens and get the right people to do it." (ACCP 2)</i></p>                                                                                                                                                                                                                                                                                               |

## Lack of agency

Throughout participant descriptions of the various facets of moral distress, a key overarching theme of lack of agency emerged. This was consistent across professions and persisted through different contexts of moral distress, descriptions of scenarios, responses to moral distress, and coping strategies and interventions for moral distress. This powerlessness and sense of a lack of control appears central in the development of moral distress and how individuals respond to and cope with it.

*"I came away feeling a bit guilty but equally knowing that there was nothing I could have done to avoid that." (Other 2)*

*"Yeah the more you reflect on it, maybe it's better not to reflect too heavily on it... your hands are essentially tied aren't they?" (ACCP 2)*

*"I feel like somebody should be able to stop it but I don't know who that might be." (Doctor 5)*

## Discussion

This is the largest study of moral distress in UK ICUs to date and the first to use a multi-centre approach with assessment across ICU professions. Included ICUs were at both district general and teaching hospitals and were of varying size and sub-specialty capability. Moral distress was widespread across included sites and across ICU professions. Moral distress scores were highest in situations related to delivering aggressive treatment that was perceived as futile or not in the patient's best interests, closely followed by lack of resources compromising delivered care. Interview data also identified inability of senior staff to protect their juniors as a cause of moral distress. Moral distress was significantly worse in nurses and was not influenced by age or years of ICU experience. The multiple negative emotions engendered by this repeated experience can lead to withdrawal from engagement with patients and families, likely leading to poorer clinical care, and ultimately to withdrawal from intensive care as a career choice. There was a strong association between higher moral distress scores and intention to leave a current post, or leaving a previous post highlighting the impact moral distress may have on ICU staff retention. It is concerning that one third of participants reported an intention to leave their current post due to moral distress. Interview participants described a range of individualised coping mechanisms when experiencing moral distress. In general, informal support mechanisms were preferred to more formal arrangements. This study took place before the COVID-19 pandemic and it is possible the immense pressures on UK ICU services has had further impact on the experience of moral distress. This should be recognised when considering how this study reflects the current welfare of UK ICU professionals.

1  
2  
3 The only other quantitative study of moral distress in UK ICUs to date also found moral distress was  
4 significantly associated with an intention to leave a post, a finding consistent with international  
5 literature.(16, 20, 31, 38) It is increasingly clear that the impact of moral distress appears damaging to  
6 staff retention and should be considered by employers.(10, 16) Colville *et al.* were unable to detect a  
7 difference in moral distress scores between nurses and doctors and highlight the confounding impact  
8 of gender differences. Our larger study found that moral distress is greater in nurses and this  
9 difference remained statistically significant after accounting for differences in gender distributions.  
10 This finding is consistent with international studies showing that nurses report greater moral distress  
11 than doctors.(20, 36, 38) It is also notable that nurses had a significantly greater intention to leave the  
12 profession, including in adjusted analyses. Indeed, 37% of nurses included in our study indicated they  
13 were considering leaving their current post due to moral distress, compared with 15% of doctors. This  
14 is consistent with research from Canada,(20) and is a concerning finding that potentially has staff  
15 retention and workplace planning implications.

16 Compared to similar research in the USA also using the most up to date measure of moral distress,  
17 overall moral distress scores were higher in our study, and this was consistent across all professional  
18 subgroups.(36) Almost all highly ranked individual item composite scores were higher in our study  
19 than that in the USA. This was most notable for resource-related items, specifically compromised care  
20 due to lack of resources/equipment/bed capacity, where the composite moral distress score was  
21 substantially higher in our UK study. This was ranked the second highest item by moral distress score  
22 in our study for both doctors and nurses, but ranked fifth in the comparative USA study. This could  
23 reflect differences in healthcare delivery and poorer provision of critical care beds per population in  
24 the UK.(33-35) This high signal of moral distress raises a worrying concern that sub-optimal care may  
25 be being delivered due to resource constraints. This study is unable to determine if this is occurring,  
26 nevertheless the high levels of moral distress due to resource-related issues should be noted.

27 Our finding that moral distress occurs frequently in situations related to delivery of aggressive  
28 treatment perceived as futile or not in the patient's best interests is consistent with international  
29 research using the previous versions of the quantitative moral distress scale.(14, 25, 31) It is also  
30 supported by other qualitative studies.(18, 19, 26)

31 It is increasingly clear that moral distress is widespread and detrimental within intensive care.(39-41)  
32 A key question is therefore how to prevent and mitigate it. Given our finding of lack of agency as a  
33 driver of moral distress, one preventive strategy would be to improve agency and empower clinical  
34 staff to speak out. Hamric *et al.* report how a moral distress consultation service was successful in  
35 empowering staff in situations where they had felt unheard or powerless.(42)

1  
2  
3 Our qualitative findings suggest that interventions aimed at combating moral distress require a  
4 tailored approach that recognises the individualistic nature of coping with moral distress.  
5 Individualised informal support appears the most common coping strategy and is often effective if it  
6 takes place in an organisational culture that provides a supportive environment. Our participants  
7 frequently reported that smaller ICUs were more supportive and more able to permit informal coping  
8 compared with larger ICUs. This is noteworthy as UK intensive care services move towards  
9 regionalisation with larger ICUs on a “hub and spoke” model to meet increasing care demands.(43) It  
10 may be possible to replicate the benefits of smaller units at larger ICUs by working in smaller, close-  
11 knit teams caring for “pods” of beds within the larger ICU. Embedding senior professionals who are  
12 nominated to facilitate discussion to cope with moral distress within these teams could be beneficial.  
13 Supporting effective coping could produce a positive feedback loop that encourages staff retention,  
14 therefore promoting a close-knit team and allowing formation of the staff relationships which appear  
15 so important in facilitating informal coping. Conversely, failure to control moral distress could produce  
16 a negative spiral due to its deleterious effects on career decisions.(14, 16, 20)

17  
18 Our study has several limitations. Firstly, the study is at risk of selection bias. Those experiencing high  
19 levels of moral distress may be unwilling to participate and relive their experiences, or alternatively  
20 those with low levels of moral distress may not appreciate its value and not take part. This may be  
21 reflected in the response rate. We only included those currently working in ICU and so cannot capture  
22 those that may have left ICU due to high levels of moral distress. We attempted to improve external  
23 validity by including multiple ICUs which had different operational characteristics. Purposive sampling  
24 ensured the interview sample reflected the total questionnaire sample and included representation  
25 of all hospitals, a range of professions, seniority, age and gender. Secondly, our study includes more  
26 nurses than other professions, however this reflects the distribution of ICU professions.(21) Thirdly,  
27 this study is a snapshot and may be influenced by how the participant is feeling at that time, or what  
28 clinical cases are present on their unit. Moral distress may be a reactive process and be influenced by  
29 experiences at that point in time.(44) It is possible that moral distress may fluctuate and change as  
30 the clinical case-mix within an ICU changes. It remains unknown how moral distress changes over time  
31 and further study is warranted.

32  
33 This study highlights the widespread nature of moral distress in UK ICUs and across ICU professions.  
34 Moral distress is worst in situations related to delivery of aggressive treatment perceived as futile or  
35 not in the patient’s best interests, and this finding is consistent with previous international research.  
36 Moral distress in UK ICUs appears to be more frequently experienced than in North America, in  
37 particular moral distress related to resource constraints. Moral distress is greatest in nurses and is  
38 independently associated with an intention to leave the profession, both at present and in the past.

1  
2  
3 This study took place before the COVID-19 pandemic and even at that time one third of participants  
4 were considering leaving their current position. Moral distress is therefore a pressing problem for NHS  
5 trusts and policymakers seeking to retain and support an effective ICU workforce. In order to provide  
6 a healthy and sustainable intensive care workforce for the future it will be important to acknowledge  
7 moral distress and provide environments that are supportive to staff and facilitate coping strategies.  
8 Policy decisions on the provision of intensive care services should take into account the importance of  
9 supportive environments and close-knit teams in facilitating coping with the almost inevitable moral  
10 distress and psychological pressures associated with working in intensive care.  
11  
12  
13  
14  
15  
16  
17  
18  
19  
20  
21  
22  
23  
24  
25  
26  
27  
28  
29  
30  
31  
32  
33  
34  
35  
36  
37  
38  
39  
40  
41  
42  
43  
44  
45  
46  
47  
48  
49  
50  
51  
52  
53  
54  
55  
56  
57  
58  
59  
60

For peer review only

## Acknowledgments

We are grateful for the expert statistical support provided by Dr Georgios Bouliotis. We sincerely thank the healthcare professionals for voluntarily participating in this research and giving their time for interviews. The National Institute of Academic Anaesthesia kindly supported this study with an Association of Anaesthetists/*Anaesthesia* research grant awarded to AJB. The NIHR Clinical Research Network adopted this study onto their portfolio and the support of the research teams at all sites is greatly appreciated. We are very grateful for the PPI input and contributions made by the University Hospitals Birmingham Clinical Research Ambassador Group.

## Ethics approval

This study involves human participants but an Ethics Committee(s) or Institutional Board(s) exempted this study. Approvals gained from the NHS Health Research Authority (IRAS:238379). University Hospitals Coventry and Warwickshire NHS Trust acted as study sponsor. Local approvals from each study site Research & Development department.

## Contribution statement

Study design: AJB, JY, AMS, CB. Study conduct: AJB, JY, AMS, CB. Data analysis: AJB, AMS. Drafting of manuscript: AJB, AMS. Review of manuscript: AJB, JY, AMS, CB.

## Funding statement

This work was supported by an Association of Anaesthetists/*Anaesthesia* research grant administered by the National Institute of Academic Anaesthesia. Grant number NIAA19R102.

## Competing interest

AJB is supported by an NIHR funded Academic Clinical Fellowship.

## Data sharing statement

Statistical code for analyses used R version 3.6.1 (R Foundation for Statistical Computing) are available on reasonable request.

## References

1. Dzau VJ, Kirch D, Nasca T. Preventing a Parallel Pandemic — A National Strategy to Protect Clinicians' Well-Being. *New England Journal of Medicine*. 2020;383(6):513-5.
2. Greenberg N, Docherty M, Gnanapragasam S, Wessely S. Managing mental health challenges faced by healthcare workers during covid-19 pandemic. *BMJ*. 2020;368:m1211.
3. Shapiro J, McDonald TB. Supporting Clinicians during Covid-19 and Beyond — Learning from Past Failures and Envisioning New Strategies. *New England Journal of Medicine*. 2020;383(27):e142.
4. Sheather J, Fidler H. Covid-19 has amplified moral distress in medicine. *BMJ*. 2021;372:n28.
5. British Medical Association. Moral distress and moral injury: recognising and tackling it for UK doctors. 2021.
6. NHS Health Education England. NHS Staff and Learners' Mental Wellbeing Commission report. 2019.
7. Hall LH, Johnson J, Watt I, Tsipa A, O'Connor DB. Healthcare Staff Wellbeing, Burnout, and Patient Safety: A Systematic Review. *PloS one*. 2016;11(7):e0159015-e.
8. McClelland L, Plunkett E, McCrossan R, Ferguson K, Fraser J, Gildersleve C, et al. A national survey of out-of-hours working and fatigue in consultants in anaesthesia and paediatric intensive care in the UK and Ireland. *Anaesthesia*. 2019;74(12):1509-23.
9. Lamiani G, Borghi L, Argentero P. When healthcare professionals cannot do the right thing: A systematic review of moral distress and its correlates. *Journal of health psychology*. 2017;22(1):51-67.
10. Fumis RRL, Junqueira Amarante GA, de Fátima Nascimento A, Vieira Junior JM. Moral distress and its contribution to the development of burnout syndrome among critical care providers. *Annals of intensive care*. 2017;7(1):71-.
11. Dzung E, Curtis JR. Understanding ethical climate, moral distress, and burnout: a novel tool and a conceptual framework. 2018;27(10):766-70.
12. Royal College of Anaesthetists. A report on the welfare, morale and experiences of anaesthetists in training: the need to listen. 2017.
13. Dodek PM, Cheung EO, Burns KE, Martin CM, Archambault PM, Lauzier F, et al. Moral Distress and Other Wellness Measures in Canadian Critical Care Physicians. *Annals of the American Thoracic Society*. 2020;24.
14. Elpern EH, Covert B, Kleinpell R. Moral distress of staff nurses in a medical intensive care unit. *American journal of critical care : an official publication, American Association of Critical-Care Nurses*. 2005;14(6):523-30.
15. Jameton A. *Nursing practice: The ethical issues*: New Jersey: Prentice Hall Inc; 1984.
16. Hamric AB. Empirical research on moral distress: issues, challenges, and opportunities. *HEC forum : an interdisciplinary journal on hospitals' ethical and legal issues*. 2012;24(1):39-49.
17. Morley G, Ives J, Bradbury-Jones C, Irvine F. What is 'moral distress'? A narrative synthesis of the literature. *Nursing ethics*. 2017;26(3):646-62.
18. Choe K, Kang Y, Park Y. Moral distress in critical care nurses: a phenomenological study. *Journal of advanced nursing*. 2015;71(7):1684-93.
19. Morley G, Bradbury-Jones C, Ives J. What is 'moral distress' in nursing? A feminist empirical bioethics study. *Nursing ethics*. 2020;27(5):1297-314.
20. Dodek PM, Wong H, Norena M, Ayas N, Reynolds SC, Keenan SP, et al. Moral distress in intensive care unit professionals is associated with profession, age, and years of experience. *Journal of critical care*. 2016;31(1):178-82.
21. The Faculty of Intensive Care Medicine, Intensive Care Society. Guidelines for the provision of intensive care services. Edition 2. 2019.
22. Sprung CL, Cohen SL, Sjøkvist P, Baras M, Bulow HH, Hovilehto S, et al. End-of-life practices in European intensive care units: the Ethicus Study. *Jama*. 2003;290(6):790-7.
23. Corley MC. Moral distress of critical care nurses. *American journal of critical care : an official publication, American Association of Critical-Care Nurses*. 1995;4(4):280-5.



24. Rodney P. Moral distress in critical care nursing. *Canadian critical care nursing journal*. 1988;5(2):9-11.
25. Hamric AB, Borchers CT, Epstein EG. Development and Testing of an Instrument to Measure Moral Distress in Healthcare Professionals. *AJOB Primary Research*. 2012;3(2):1-9.
26. Henrich NJ, Dodek PM, Alden L, Keenan SP, Reynolds S, Rodney P. Causes of moral distress in the intensive care unit: A qualitative study. *Journal of critical care*. 2016;35:57-62.
27. Schwenzer KJ, Wang L. Assessing moral distress in respiratory care practitioners. *Critical care medicine*. 2006;34(12):2967-73.
28. Monrouxe LV, Rees CE, Dennis I, Wells SE. Professionalism dilemmas, moral distress and the healthcare student: insights from two online UK-wide questionnaire studies. *BMJ open*. 2015;5(5):e007518.
29. Quek CWN, Ong RRS, Wong RSM, Chan SWK, Chok AK-L, Shen GS, et al. Systematic scoping review on moral distress among physicians. *BMJ open*. 2022;12(9):e064029.
30. Pathman DE, Sonis J, Rauner TE, Alton K, Headlee AS, Harrison JN. Moral distress among clinicians working in US safety net practices during the COVID-19 pandemic: a mixed methods study. *BMJ open*. 2022;12(8):e061369.
31. Colville G, Dawson D, Rabinthiran S, Chaudry-Daley Z, Perkins-Porras L. A survey of moral distress in staff working in intensive care in the UK. *Journal of the Intensive Care Society*. 2018.
32. St Ledger U, Begley A, Reid J, Prior L, McAuley D, Blackwood B. Moral distress in end-of-life care in the intensive care unit. *Journal of advanced nursing*. 2013;69(8):1869-80.
33. Böhm K, Schmid A, Götze R, Landwehr C, Rothgang H. Five types of OECD healthcare systems: Empirical results of a deductive classification. *Health Policy*. 2013;113(3):258-69.
34. Wallace DJ, Angus DC, Seymour CW, Barnato AE, Kahn JM. Critical Care Bed Growth in the United States. A Comparison of Regional and National Trends. *American journal of respiratory and critical care medicine*. 2014;191(4):410-6.
35. Wong DJN, Popham S, Wilson AM, Barneto LM, Lindsay HA, Farmer L, et al. Postoperative critical care and high-acuity care provision in the United Kingdom, Australia, and New Zealand. *British journal of anaesthesia*. 2019;122(4):460-9.
36. Epstein EG, Whitehead PB, Prompahakul C, Thacker LR, Hamric AB. Enhancing Understanding of Moral Distress: The Measure of Moral Distress for Health Care Professionals. *AJOB Empir Bioeth*. 2019;10(2):113-24.
37. Gale NK, Heath G, Cameron E, Rashid S, Redwood S. Using the framework method for the analysis of qualitative data in multi-disciplinary health research. *BMC Medical Research Methodology*. 2013;13(1):117.
38. Whitehead PB, Herbertson RK, Hamric AB, Epstein EG, Fisher JM. Moral distress among healthcare professionals: report of an institution-wide survey. *Journal of nursing scholarship : an official publication of Sigma Theta Tau International Honor Society of Nursing*. 2015;47(2):117-25.
39. Oh Y, Gastmans C. Moral distress experienced by nurses:A quantitative literature review. *Nursing ethics*. 2015;22(1):15-31.
40. Morley G, Ives J, Bradbury-Jones C, Irvine F. What is 'moral distress'? A narrative synthesis of the literature. *Nursing ethics*. 2019;26(3):646-62.
41. Tigard DW. Rethinking moral distress: conceptual demands for a troubling phenomenon affecting health care professionals. *Med Health Care Philos*. 2018;21(4):479-88.
42. Hamric AB, Epstein EG. A Health System-wide Moral Distress Consultation Service: Development and Evaluation. *HEC forum : an interdisciplinary journal on hospitals' ethical and legal issues*. 2017;29(2):127-43.
43. Suntharalingam G, Handy J, Walsh A. Regionalisation of critical care: can we sustain an intensive care unit in every hospital? *Anaesthesia*. 2014;69(10):1069-73.
44. Jameton A. Dilemmas of moral distress: moral responsibility and nursing practice. *AWHONN's clinical issues in perinatal and women's health nursing*. 1993;4(4):542-51.

## Figures

**Figure 1** Relationship between moral distress total and demographic/professional variables. F=Female, M=Male, DGH=District General Hospital, TCH=Tertiary Care Hospital. N=213 as 14 questionnaires excluded due to missing responses preventing calculation of the moral distress score

For peer review only

1  
2  
3  
4  
5  
6  
7  
8  
9  
10  
11  
12  
13  
14  
15  
16  
17  
18  
19  
20  
21  
22  
23  
24  
25  
26  
27  
28  
29  
30  
31  
32  
33  
34  
35  
36  
37  
38  
39  
40  
41  
42  
43  
44  
45  
46  
47  
48  
49  
50  
51  
52  
53  
54  
55  
56  
57  
58  
59  
60

For peer review only

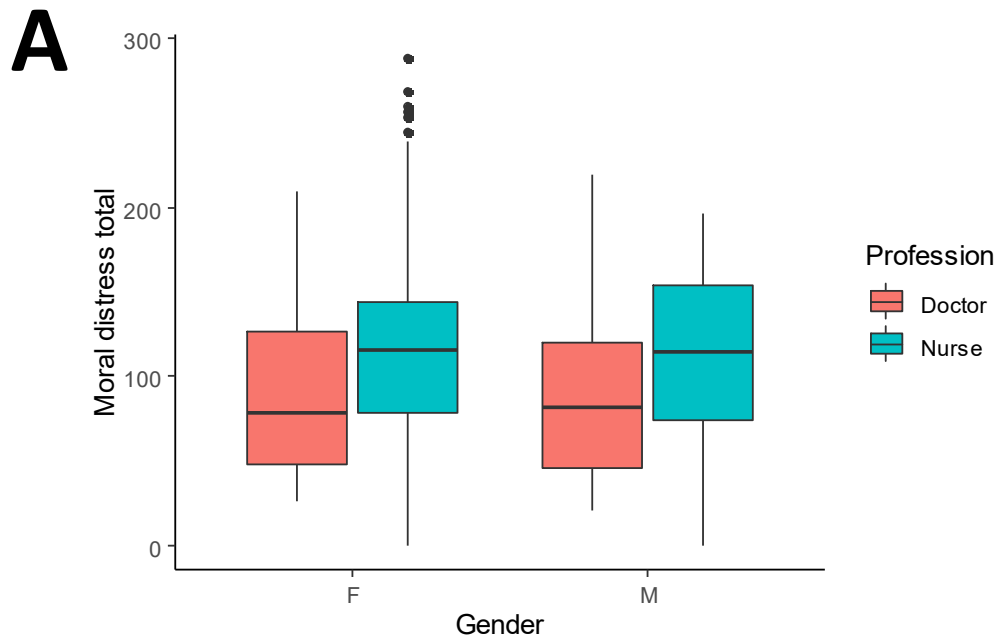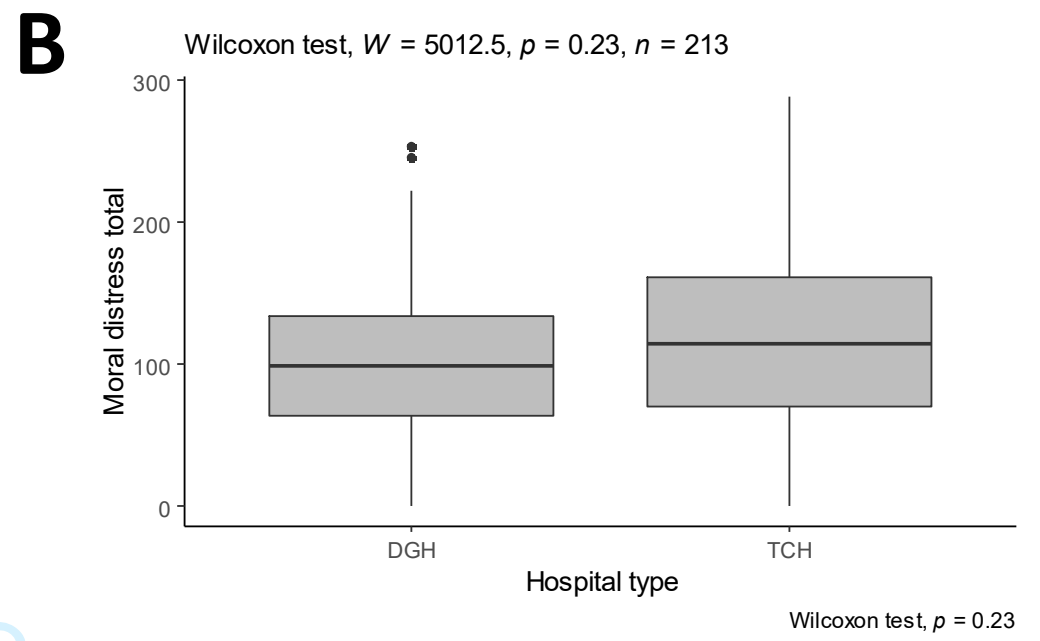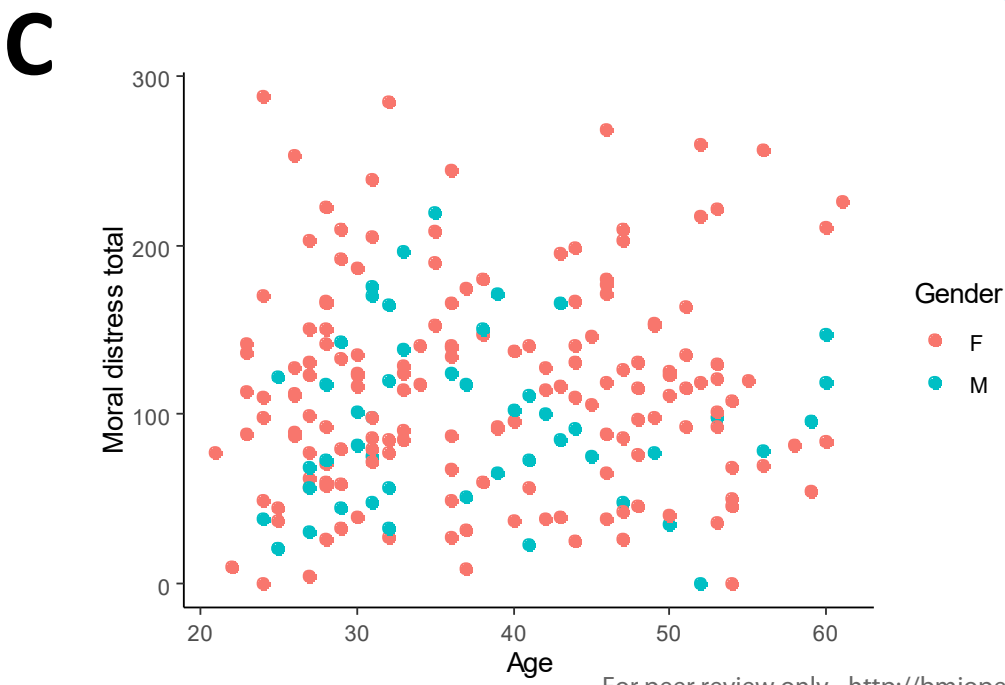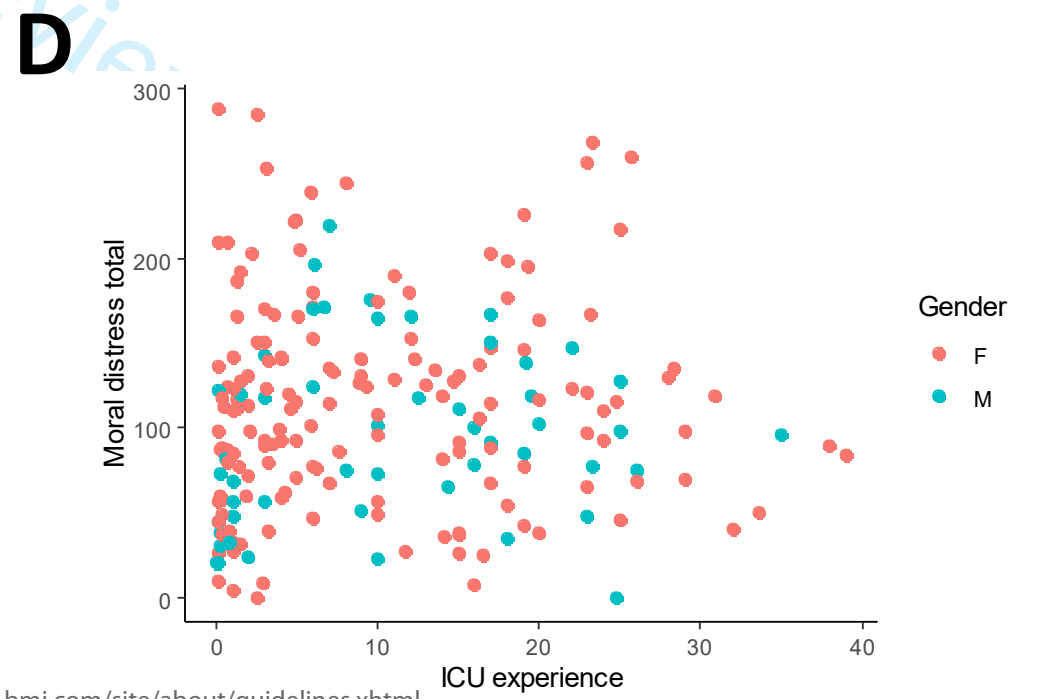

ID:

Demographics

# Moral distress amongst intensive care unit professions in the UK

Moral distress happens when we *cannot do* what we believe is the *ethically right thing* to do because of barriers or constraints.

Work in North America tells us this is a widespread experience and is damaging to healthcare professionals. However, this is poorly studied in the UK and we are interested your experiences.

Profession (please circle): Doctor / Nurse / ACCP / Physiotherapist / Other (please specify).....

Place of work (please circle): BHH / GHH / QEHB / UHCW / Other (please specify) .....

Age:                      Gender:                      Grade:

Years of working experience:

Experience in ICU (years and months):

**Many thanks for your interest in taking part in this study. Your responses are anonymous.**

**Please complete the questionnaire overleaf as accurately as possible.**

**This research is funded by the National Institute of Academic Anaesthesia (NIAA), supported by the NHS National Institute for Health Research (NIHR), and conducted by researchers at the University of Warwick.**

**This research is independent of your hospital trust**



SUPPORTED BY

**NIHR** | National Institute  
for Health Research



ID:

Demographics

We are inviting participants to undertake a semi-structured interview to further investigate moral distress. This will take approximately 30 minutes. We are interested in your direct experiences of moral distress.

We will do this at a time that is convenient for the participant. If you are willing to take part, please leave your contact details below and we will contact you to arrange a convenient time and place.

Name:

Email:

Mobile number:

For peer review only

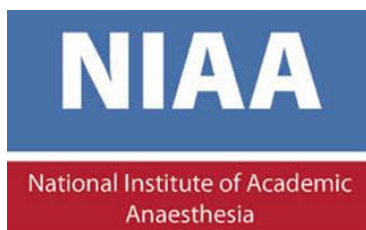

SUPPORTED BY

The logo for the National Institute for Health Research (NIHR) consists of the acronym 'NIHR' in a large, bold, blue, sans-serif font. To its right, the full name 'National Institute for Health Research' is written in a smaller, blue, sans-serif font, separated by a vertical line.

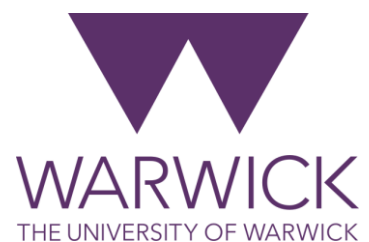

ID:

## Measure of Moral Distress – Healthcare Professionals (MMD-HP)

**Moral distress occurs when professionals cannot carry out what they believe to be ethically appropriate actions because of constraints or barriers. This survey lists situations that occur in clinical practice. If you have experienced these situations they may or may not have been morally distressing to you. Please indicate how frequently you have experienced each item. Also, rank how distressing these situations are for you. If you have never experienced a particular situation, select “0” (never) for frequency. Even if you have not experienced a situation, please indicate how distressed you would be if it occurred in your practice. Note that you will respond to each item by checking the appropriate column for two dimensions with a ●: *Frequency and Level of Distress.***

|                                                                                                                                                                  | Frequency |   |                 |   |   | Level of Distress |   |                  |   |   |
|------------------------------------------------------------------------------------------------------------------------------------------------------------------|-----------|---|-----------------|---|---|-------------------|---|------------------|---|---|
|                                                                                                                                                                  | Never     |   | Very frequently |   |   | None              |   | Very distressing |   |   |
|                                                                                                                                                                  | 0         | 1 | 2               | 3 | 4 | 0                 | 1 | 2                | 3 | 4 |
| <i>Example entry:</i><br>Witness healthcare providers giving “false hope” to a patient or family.                                                                |           |   | ●               |   |   |                   |   |                  | ● |   |
| 1. Witness healthcare providers giving “false hope” to a patient or family.                                                                                      |           |   |                 |   |   |                   |   |                  |   |   |
| 2. Follow the family’s insistence to continue aggressive treatment even though I believe it is not in the best interest of the patient.                          |           |   |                 |   |   |                   |   |                  |   |   |
| 3. Feel pressured to order or carry out orders for what I consider to be unnecessary or inappropriate tests and treatments.                                      |           |   |                 |   |   |                   |   |                  |   |   |
| 4. Be unable to provide optimal care due to pressures from administrators or insurers to reduce costs.                                                           |           |   |                 |   |   |                   |   |                  |   |   |
| 5. Continue to provide aggressive treatment for a person who is most likely to die regardless of this treatment when no one will make a decision to withdraw it. |           |   |                 |   |   |                   |   |                  |   |   |
| 6. Be pressured to avoid taking action when I learn that a physician, nurse, or other team colleague has made a medical error and does not report it.            |           |   |                 |   |   |                   |   |                  |   |   |
| 7. Be required to care for patients whom I do not feel qualified to care for.                                                                                    |           |   |                 |   |   |                   |   |                  |   |   |
| 8. Participate in care that causes unnecessary suffering or does not adequately relieve pain or symptoms.                                                        |           |   |                 |   |   |                   |   |                  |   |   |
| 9. Watch patient care suffer because of a lack of provider continuity.                                                                                           |           |   |                 |   |   |                   |   |                  |   |   |
| 10. Follow a physician’s or family member’s request not to discuss the patient’s prognosis with the patient/family.                                              |           |   |                 |   |   |                   |   |                  |   |   |
| 11. Witness a violation of a standard of practice or a code of ethics and not feel sufficiently supported to report the violation.                               |           |   |                 |   |   |                   |   |                  |   |   |
| 12. Participate in care that I do not agree with, but do so because of fears of litigation.                                                                      |           |   |                 |   |   |                   |   |                  |   |   |
| 13. Be required to work with other healthcare team members who are not as competent as patient care requires.                                                    |           |   |                 |   |   |                   |   |                  |   |   |
| 14. Witness low quality of patient care due to poor team communication.                                                                                          |           |   |                 |   |   |                   |   |                  |   |   |
| 15. Feel pressured to ignore situations in which patients have not been given adequate information to ensure informed consent.                                   |           |   |                 |   |   |                   |   |                  |   |   |

ID:

|                                                                                                                  | Frequency |   |                 |   |   | Level of Distress |   |                  |   |   |
|------------------------------------------------------------------------------------------------------------------|-----------|---|-----------------|---|---|-------------------|---|------------------|---|---|
|                                                                                                                  | Never     |   | Very frequently |   |   | None              |   | Very distressing |   |   |
|                                                                                                                  | 0         | 1 | 2               | 3 | 4 | 0                 | 1 | 2                | 3 | 4 |
| 16. Be required to care for more patients than I can safely care for.                                            |           |   |                 |   |   |                   |   |                  |   |   |
| 17. Experience compromised patient care due to lack of resources/equipment/bed capacity.                         |           |   |                 |   |   |                   |   |                  |   |   |
| 18. Experience lack of administrative action or support for a problem that is compromising patient care.         |           |   |                 |   |   |                   |   |                  |   |   |
| 19. Have excessive documentation requirements that compromise patient care.                                      |           |   |                 |   |   |                   |   |                  |   |   |
| 20. Fear retribution if I speak up.                                                                              |           |   |                 |   |   |                   |   |                  |   |   |
| 21. Feel unsafe/bullied amongst my own colleagues.                                                               |           |   |                 |   |   |                   |   |                  |   |   |
| 22. Be required to work with abusive patients/family members who are compromising quality of care.               |           |   |                 |   |   |                   |   |                  |   |   |
| 23. Feel required to overemphasize tasks and productivity or quality measures at the expense of patient care.    |           |   |                 |   |   |                   |   |                  |   |   |
| 24. Be required to care for patients who have unclear or inconsistent treatment plans or who lack goals of care. |           |   |                 |   |   |                   |   |                  |   |   |
| 25. Work within power hierarchies in teams, units, and my institution that compromise patient care.              |           |   |                 |   |   |                   |   |                  |   |   |
| 26. Participate on a team that gives inconsistent messages to a patient/family.                                  |           |   |                 |   |   |                   |   |                  |   |   |
| 27. Work with team members who do not treat vulnerable or stigmatized patients with dignity and respect.         |           |   |                 |   |   |                   |   |                  |   |   |
| If there are other situations in which you have felt moral distress, please write and score them here:           |           |   |                 |   |   |                   |   |                  |   |   |
|                                                                                                                  |           |   |                 |   |   |                   |   |                  |   |   |
|                                                                                                                  |           |   |                 |   |   |                   |   |                  |   |   |

Have you ever left or considered leaving a clinical position due to moral distress?

- No, I have never considered leaving or left a position.
- Yes, I considered leaving but did not leave.
- Yes, I left a position.

Are you considering leaving your position now?

- Yes
- No



## Interview guide

### Introduction:

Introduce self and project.

Confirm confidentiality. Confirm that individual comments will not be discussed with employers and seniors. The research team is independent of the hospital management and working with a Health Research Authority framework and the data is secure.

Advise there are no right or wrong answers and we are interested in their experiences and views and would like them to be as honest as possible.

I may make the occasional note during the interview.

Ensure written informed consent. Advice of audio-recording Could you just confirm that you are happy to be audio-recorded.

Please describe your role and professional background: Age, clinical speciality, professional role, years in current role, years of work.

### **Beginning questions:**

Do you experience ethical dilemmas or issues at work?

What kind of things make you feel uncomfortable at work?

Can you give me a specific example?

How did it make you feel?

What did you do?

What kind of things do you find challenging or upsetting at work?

Can you give me a specific example?

How did it make you feel?

What did you do?

What sort of work issues preoccupy you after work?

Can you give me a specific example?

How did it make you feel?

What did you do?

Have you had a situation where you felt that your personal beliefs were in conflict with what a patient wanted? With what the team wanted? What the patient's consultant wanted?

Can you give me a specific example?

How did it make you feel?

What did you do?

## Interview guide

1  
2  
3  
4  
5 Have you ever felt like you have had to give treatment that you did not agree with?

6  
7 Can you give me a specific example?

8  
9 How did it make you feel?

10  
11 What did you do?  
12  
13

14 When you experience these kinds of situations, how do you cope?

15  
16 Do you discuss them with anyone?

17  
18 Do you have any support networks for discussing this kind of thing?  
19  
20

21  
22 What do you think could be done to support doctors/nurses facing these situations?  
23  
24  
25  
26  
27  
28

29 **Probes:**

30  
31 Can you provide a bit more background, such as why the patient was in hospital?

32  
33 Can you describe how this made you feel?

34  
35 What were your thoughts and feelings during this?

36  
37 What were your thoughts and feelings after this?

38  
39 Can you describe the ethical issues?

40  
41 Can you provide an example?  
42  
43

44 Do you seek any support? Did the support help?

45  
46 What support or help do you think could help?  
47  
48  
49

50 Can you tell me a bit more about that?

51  
52 How did you feel about that?

53  
54 What was helpful?  
55  
56  
57  
58  
59  
60

**Supplementary Table 1** Interview participant demographics

| <b>Characteristic</b>                      | <b>N=15</b>                               |
|--------------------------------------------|-------------------------------------------|
| Mean age $\pm$ SD – years                  | 40.6 $\pm$ 9.1                            |
| Gender – no. (%)                           |                                           |
| Female                                     | 9 (60.0%)                                 |
| Male                                       | 5 (40.0%)                                 |
| Profession – no. (%)                       |                                           |
| Nurse                                      | 6 (40.0%)                                 |
| Band 5                                     | 2                                         |
| Band 7                                     | 3                                         |
| Band 8                                     | 1                                         |
| Doctor                                     | 5 (33.3%)                                 |
| Core trainee level                         | 2                                         |
| Specialty trainee level                    | 2                                         |
| Consultant                                 | 1                                         |
| Advanced Critical Care Practitioner (ACCP) | 2 (13.3%)                                 |
| Other                                      | 2 (13.3%)                                 |
| Mean ICU experience $\pm$ SD – years       | 11.1 $\pm$ 9.2                            |
| Workplace – no. (%)                        |                                           |
| Site A                                     | 4 (26.7%)                                 |
| Site B                                     | 5 (33.3%)                                 |
| Site C                                     | 6 (40.0%) (3 (20.0%) work at Site D also) |

**Supplementary Table 2** Moral distress items ranked by composite moral distress score for nurses and doctors.

\*indicates mean composite score greater for doctors than nurses.

| Situation                                                                                                                                                     | Nurses         |      | Doctors        |      |
|---------------------------------------------------------------------------------------------------------------------------------------------------------------|----------------|------|----------------|------|
|                                                                                                                                                               | Mean (SD)      | Rank | Mean (SD)      | Rank |
| Continue to provide aggressive treatment for a person who is most likely to die regardless of this treatment when no one will make a decision to withdraw it. | 9.24<br>(4.62) | 1    | 5.98<br>(3.38) | 4    |
| Experience compromised patient care due to lack of resources/equipment/bed capacity.                                                                          | 8.1<br>(5.15)  | 2    | 7.29<br>(5.25) | 2    |
| Have excessive documentation requirements that compromise patient care.                                                                                       | 7.51<br>(5.46) | 3    | 3.92<br>(3.99) | 8    |
| Follow the family's insistence to continue aggressive treatment even though I believe it is not in the best interest of the patient.                          | 7.45<br>(4.24) | 4    | 7.45<br>(4.40) | 1    |
| Be required to work with abusive patients/family members who are compromising quality of care.                                                                | 6.82<br>(4.82) | 5    | 4.03<br>(3.93) | 7    |
| Be required to care for more patients than I can safely care for.                                                                                             | 6.60<br>(4.95) | 6    | 6.02<br>(5.30) | 3    |
| Be required to work with other healthcare team members who are not as competent as patient care requires.                                                     | 6.25<br>(4.87) | 7    | 3.02<br>(3.57) | 15   |
| Witness healthcare providers giving "false hope" to a patient or family.                                                                                      | 5.62<br>(4.05) | 8    | 4.82<br>(3.73) | 6    |
| Be required to care for patients who have unclear or inconsistent treatment plans or who lack goals of care.                                                  | 5.57<br>(4.71) | 9    | 3.75<br>(3.37) | 10   |
| Feel pressured to order or carry out orders for what I consider to be unnecessary or inappropriate tests and treatments.                                      | 5.31<br>(4.17) | 10   | 3.88<br>(3.25) | 9    |
| *Experience lack of administrative action or support for a problem that is compromising patient care.                                                         | 4.89<br>(4.53) | 11   | 5.10<br>(5.33) | 5    |
| Witness low quality of patient care due to poor team communication.                                                                                           | 4.79<br>(4.11) | 12   | 3.30<br>(2.72) | 14   |
| Watch patient care suffer because of a lack of provider continuity.                                                                                           | 4.57<br>(4.62) | 13   | 3.37<br>(3.30) | 13   |
| Participate on a team that gives inconsistent messages to a patient/family.                                                                                   | 3.84<br>(3.86) | 14   | 2.10<br>(2.45) | 19   |
| Fear retribution if I speak up.                                                                                                                               | 3.72<br>(4.74) | 15   | 2.20<br>(3.74) | 17   |

|    |                                                                                |        |    |        |    |
|----|--------------------------------------------------------------------------------|--------|----|--------|----|
| 1  | Be unable to provide optimal care due to pressures from administrators to      | 3.65   | 16 | 2.38   | 16 |
| 2  | reduce costs.                                                                  | (4.96) |    | (4.07) |    |
| 3  |                                                                                |        |    |        |    |
| 4  | *Participate in care that causes unnecessary suffering or does not adequately  | 3.57   | 17 | 3.62   | 11 |
| 5  | relieve pain or symptoms.                                                      | (3.64) |    | (3.06) |    |
| 6  |                                                                                |        |    |        |    |
| 7  | Feel required to overemphasize tasks and productivity or quality measures at   | 3.36   | 18 | 1.82   | 20 |
| 8  | the expense of patient care.                                                   | (4.16) |    | (2.68) |    |
| 9  |                                                                                |        |    |        |    |
| 10 | Work within power hierarchies in teams, units, and my institution that         | 2.98   | 19 | 1.80   | 21 |
| 11 | compromise patient care.                                                       | (4.12) |    | (3.11) |    |
| 12 |                                                                                |        |    |        |    |
| 13 | Follow a physician's or family member's request not to discuss the patient's   | 2.97   | 20 | 1.45   | 23 |
| 14 | prognosis with the patient/family.                                             | (2.93) |    | (2.02) |    |
| 15 |                                                                                |        |    |        |    |
| 16 | *Participate in care that I do not agree with, but do so because of fears of   | 2.76   | 21 | 3.50   | 12 |
| 17 | litigation.                                                                    | (3.55) |    | (4.35) |    |
| 18 |                                                                                |        |    |        |    |
| 19 | Feel unsafe/bullied amongst my own colleagues.                                 | 2.27   | 22 | 0.825  | 27 |
| 20 |                                                                                | (4.16) |    | (1.63) |    |
| 21 |                                                                                |        |    |        |    |
| 22 | Feel pressured to ignore situations in which patients have not been given      | 2.12   | 23 | 1.75   | 22 |
| 23 | adequate information to ensure informed consent.                               | (3.56) |    | (2.72) |    |
| 24 |                                                                                |        |    |        |    |
| 25 | *Be required to care for patients whom I do not feel qualified to care for.    | 2.00   | 24 | 2.17   | 18 |
| 26 |                                                                                | (2.94) |    | (2.60) |    |
| 27 |                                                                                |        |    |        |    |
| 28 | Work with team members who do not treat vulnerable or stigmatized              | 1.96   | 25 | 0.925  | 26 |
| 29 | patients with dignity and respect.                                             | (3.03) |    | (1.85) |    |
| 30 |                                                                                |        |    |        |    |
| 31 | Witness a violation of a standard of practice or a code of ethics and not feel | 1.25   | 26 | 1.08   | 24 |
| 32 | sufficiently supported to report the violation.                                | (2.41) |    | (2.22) |    |
| 33 |                                                                                |        |    |        |    |
| 34 | Be pressured to avoid taking action when I learn that a physician, nurse, or   | 1.10   | 27 | 1.00   | 25 |
| 35 | other team colleague has made a medical error and does not report it.          | (1.74) |    | (1.87) |    |
| 36 |                                                                                |        |    |        |    |
| 37 |                                                                                |        |    |        |    |
| 38 |                                                                                |        |    |        |    |
| 39 |                                                                                |        |    |        |    |
| 40 |                                                                                |        |    |        |    |
| 41 |                                                                                |        |    |        |    |
| 42 |                                                                                |        |    |        |    |
| 43 |                                                                                |        |    |        |    |
| 44 |                                                                                |        |    |        |    |
| 45 |                                                                                |        |    |        |    |
| 46 |                                                                                |        |    |        |    |
| 47 |                                                                                |        |    |        |    |
| 48 |                                                                                |        |    |        |    |
| 49 |                                                                                |        |    |        |    |
| 50 |                                                                                |        |    |        |    |
| 51 |                                                                                |        |    |        |    |
| 52 |                                                                                |        |    |        |    |
| 53 |                                                                                |        |    |        |    |
| 54 |                                                                                |        |    |        |    |
| 55 |                                                                                |        |    |        |    |
| 56 |                                                                                |        |    |        |    |
| 57 |                                                                                |        |    |        |    |
| 58 |                                                                                |        |    |        |    |
| 59 |                                                                                |        |    |        |    |
| 60 |                                                                                |        |    |        |    |

**Supplementary Table 3** Logistic regression model variables and association with the ordinal dependent variable of intention to leave previous post due to moral distress (No, Considered but didn't leave, Left) in univariable and multiple analyses. Italics and \* indicate statistically significant association. (OR=Odds Ratio, CI=Confidence Interval)

| Variable                        | Univariable OR (95% CI) | p-value    | Multivariable OR (95% CI) | p-value  |
|---------------------------------|-------------------------|------------|---------------------------|----------|
| Age (per year)                  | 1.021 (0.994 – 1.049)   | 0.128      | 1.040 (0.992 – 1.093)     | 0.106    |
| ICU experience (per year)       | 1.018 (0.989 – 1.049)   | 0.226      | 0.965 (0.914 – 1.019)     | 0.201    |
| Gender                          |                         |            |                           |          |
| <i>Male</i>                     | Ref                     | Ref        | Ref                       | Ref      |
| <i>Female</i>                   | 1.914 (1.025 – 3.629)   | 0.0436*    | 1.188 (0.554 – 2.560)     | 0.659    |
| Profession                      |                         |            |                           |          |
| <i>Other</i>                    | Ref                     | Ref        | Ref                       | Ref      |
| <i>Nurse</i>                    | 1.845 (1.017 – 3.386)   | 0.0455*    | 1.460 (0.705 – 3.059)     | 0.310    |
| Hospital type                   |                         |            |                           |          |
| <i>District general</i>         | Ref                     | Ref        | Ref                       | Ref      |
| <i>Tertiary care</i>            | 1.707 (1.002 – 2.929)   | 0.0504     | 1.738 (0.937 – 3.249)     | 0.0805   |
| Moral distress total (per unit) | 1.010 (1.006 – 1.015)   | 0.0000113* | 1.009 (1.004 – 1.014)     | 0.00122* |

**Supplementary Figure 1** Qualitative analysis content area flowchart.

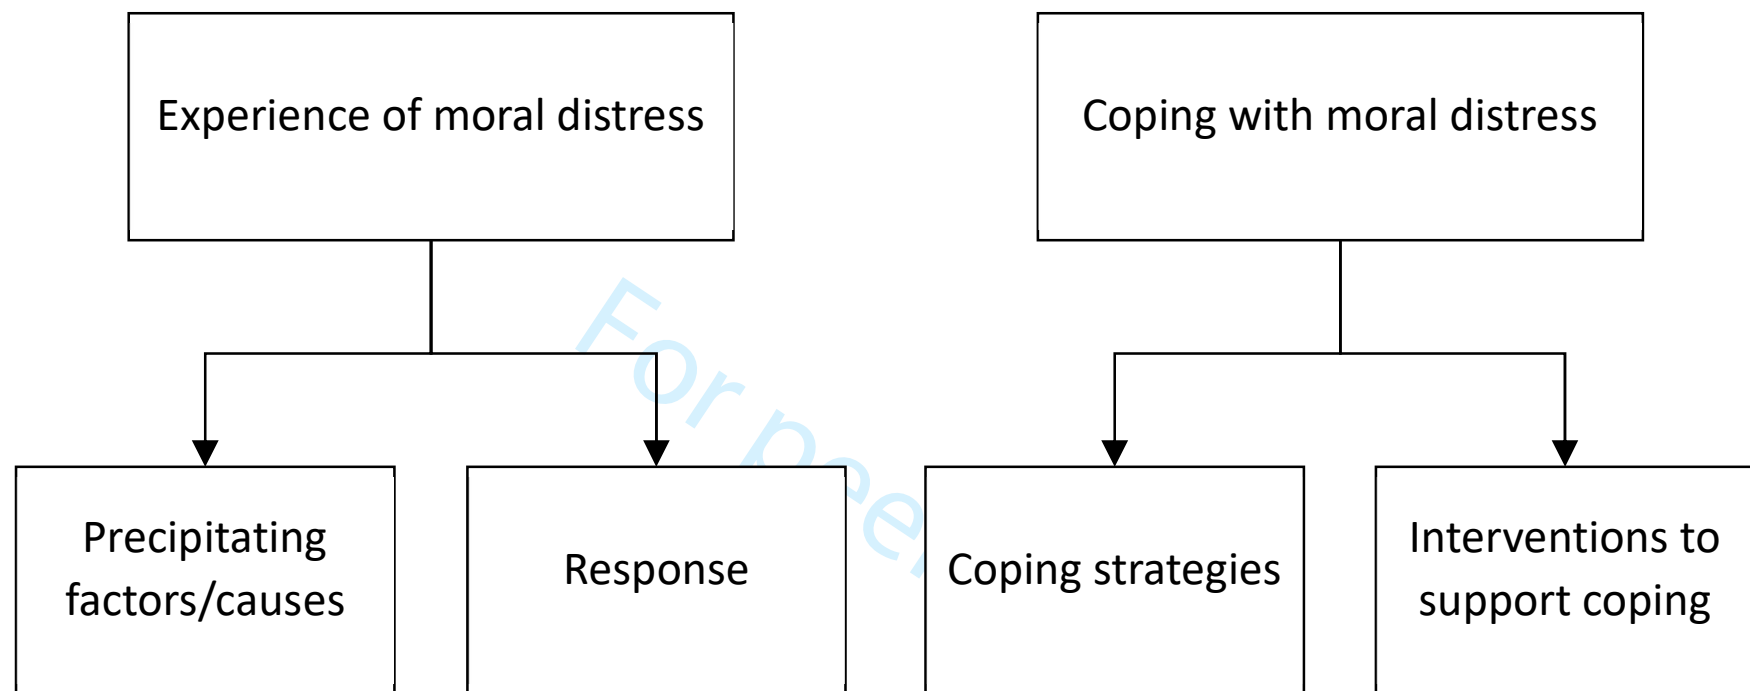

**Supplementary Figure 2** Multivariable logistic regression model prediction of intention to leave current post due to moral distress.

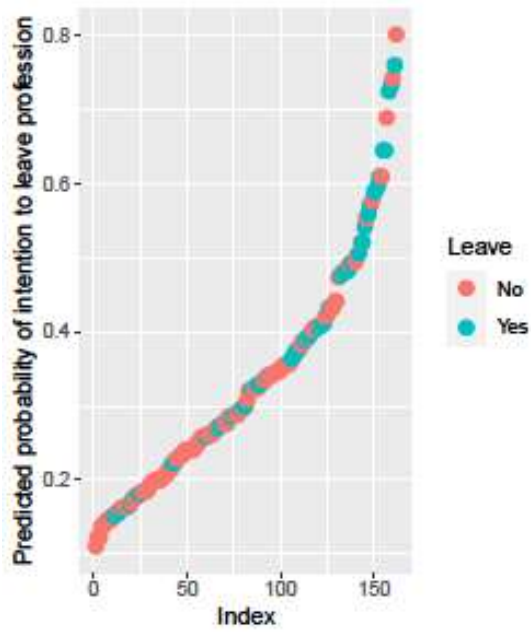

er review only
